# Supplementary material for: A Stepwise Assessment of Parsimony and Fuzzy Entropy in Species Distribution Modelling
Source: MDPI journal article supplement (doi:10.3390/e23081014), 2021-08-05

# A stepwise assessment of parsimony and fuzzy entropy in species distribution modelling

Alba Estrada & Raimundo Real

## Supplementary Materials S1.

For each of the studied **species** we show the **entropy** of each of the step of the models. Variable codes as in Table S1; entropy codes as in Table 2. The row highlighted in blue indicates the step with the lowest fuzzy entropy. We also show **favourability models**, their **evaluation metrics** and the **calibration plot** of the step with the **lowest fuzzy entropy** as well as of the **last step** (final model).  $\beta$ : coefficients; SE: standard errors; Sig: significance: \*\*\*<0.001, \*\*<0.01, \*<0.05, ns>0.05; AUC: Area Under the Curve of the Receiver Operating Characteristic; CCR: Correct Classification Rate; HL: Hosmer and Lemeshow test. Numbers in the calibration plots indicate the sample size of each bin. The **maps** in each species are the **distribution** of the species in mainland Spain, **favourability** model of the step with **lowest fuzzy entropy**, and **final favourability** model. Colour ramp as in figure 1. Only one model is shown when the step with the lowest fuzzy entropy is the final step.

### *Chioglossa lusitanica*

#### Entropy of each step:

| Step | Variable   | Cor_P | H     | Cor_F | R      | AIC     |
|------|------------|-------|-------|-------|--------|---------|
| 0    | Intercept  | -     | 8.58  | -     | 1      | 1492.84 |
| 1    | + DP1Win   | 0.812 | 6.64  | 0.882 | 0.0965 | 773.32  |
| 2    | + Sil      | 0.887 | 6.47  | 0.894 | 0.0860 | 712.08  |
| 3    | + TRan     | 0.930 | 6.36  | 0.929 | 0.0761 | 662.97  |
| 4    | + DHi      | 0.944 | 6.32  | 0.940 | 0.0673 | 651.71  |
| 5    | + DTn20    | 0.947 | 6.27  | 0.962 | 0.0505 | 641.66  |
| 6    | + DTx25Spr | 0.959 | 6.23  | 0.976 | 0.0481 | 626.74  |
| 7    | + SE       | 0.970 | 6.21  | 0.983 | 0.0443 | 619.32  |
| 8    | + DTn0Win  | 0.983 | 6.20  | 0.991 | 0.0477 | 614.23  |
| 9    | + CTI      | 0.997 | 6.167 | 0.997 | 0.0427 | 606.35  |
| 10   | - TRan     | 0.999 | 6.174 | 0.997 | 0.0441 | 606.30  |
| 11   | + Clay     | 1     | 6.170 | 1     | 0.0439 | 606.18  |

#### Favourability model of step 9:

| Variables | $\beta$ | SE      | Sig | Evaluation metrics |         |
|-----------|---------|---------|-----|--------------------|---------|
| Intercept | 13.005  | 3.49    | **  | AUC                | 0.982   |
| DP1Win    | 0.064   | 0.024   | **  | Kappa              | 0.431   |
| Sil       | 3.733   | 0.454   | *** | Sensitivity        | 0.982   |
| TRan      | -0.176  | 0.126   | ns  | Specificity        | 0.925   |
| DHi       | -0.0203 | 0.00679 | **  | CCR                | 0.927   |
| DTn20     | -0.528  | 0.156   | *** | HL                 | 5.39 ns |
| DTx25Spr  | 0.118   | 0.0455  | **  |                    |         |
| SE        | -0.0269 | 0.0105  | *   |                    |         |
| DTn0Win   | -0.0516 | 0.0142  | *** |                    |         |
| CTI       | -0.602  | 0.197   | **  |                    |         |

## *Chioglossa lusitanica* (cont.)

### Final favourability model (step 11):

| Variables | $\beta$ | SE      | Sig | Evaluation metrics |          |
|-----------|---------|---------|-----|--------------------|----------|
| Intercept | 12.07   | 3.48    | *   | AUC                | 0.982    |
| DP1Win    | 0.0806  | 0.0231  | *** | Kappa              | 0.432    |
| Sil       | 4.08    | 0.535   | *** | Sensitivity        | 0.964    |
| DHi       | -0.020  | 0.00675 | **  | Specificity        | 0.927    |
| DTn20     | -0.588  | 0.157   | *** | CCR                | 0.928    |
| DTx25Spr  | 0.0899  | 0.0390  | *   | HL                 | 10.12 ns |
| SE        | -0.0274 | 0.0105  | **  |                    |          |
| DTn0Win   | -0.0685 | 0.00895 | *** |                    |          |
| CTI       | -0.689  | 0.191   | *** |                    |          |
| Clay      | 1.744   | 1.127   | ns  |                    |          |

### Calibration plots:

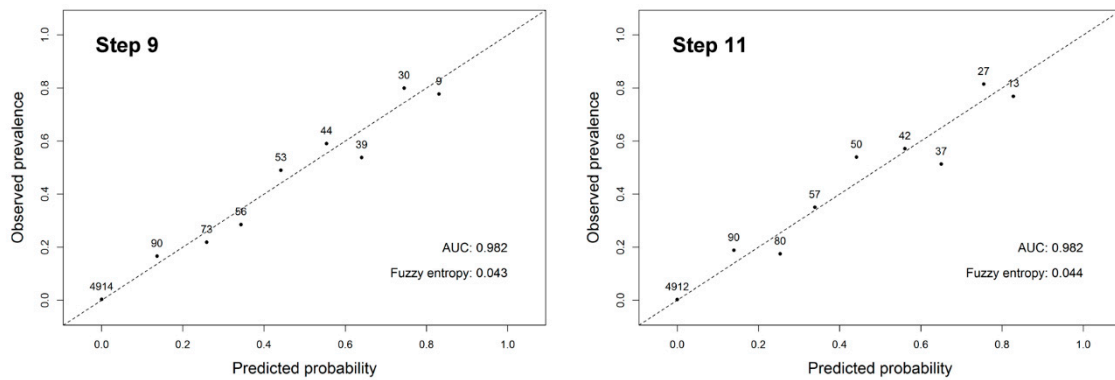

### Distribution and favourability:

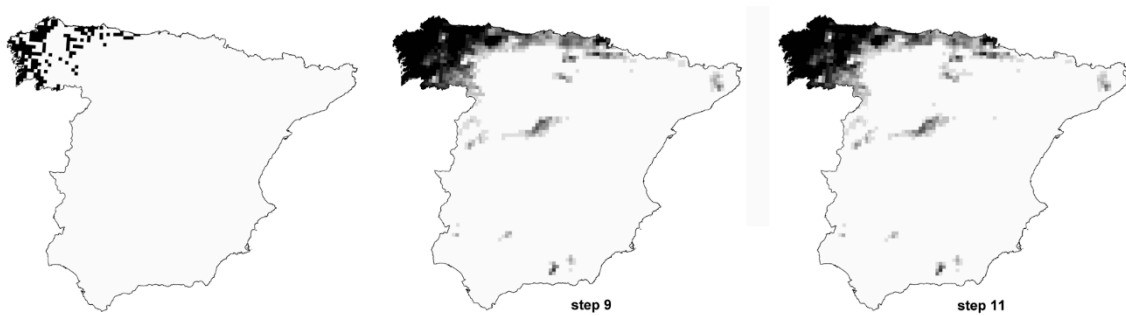

## *Euproctus asper*

Entropy of each step:

| Step | Variable  | Cor_P | H     | Cor_F | R      | AIC     |
|------|-----------|-------|-------|-------|--------|---------|
| 0    | Intercept | -     | 8.58  | -     | 1      | 1633.90 |
| 1    | + DP10Sum | 0.880 | 6.49  | 0.799 | 0.114  | 709.36  |
| 2    | + TRan    | 0.943 | 6.34  | 0.878 | 0.122  | 622.89  |
| 3    | + HPd     | 0.964 | 6.27  | 0.904 | 0.106  | 595.06  |
| 4    | + AET     | 0.969 | 6.20  | 0.944 | 0.0893 | 571.64  |
| 5    | + DTn20   | 0.980 | 6.15  | 0.950 | 0.0770 | 555.61  |
| 6    | + DTn0Sum | 0.984 | 6.12  | 0.960 | 0.0712 | 547.71  |
| 7    | + U500    | 0.985 | 6.10  | 0.974 | 0.0661 | 543.22  |
| 8    | + CTI     | 0.990 | 6.08  | 0.984 | 0.0619 | 536.99  |
| 9    | + SE      | 0.994 | 6.07  | 0.990 | 0.0608 | 532.26  |
| 10   | + DHi     | 0.996 | 6.065 | 0.993 | 0.0606 | 530.59  |
| 11   | + Sil     | 0.998 | 6.062 | 0.997 | 0.0611 | 529.15  |
| 12   | + Calc    | 1     | 6.05  | 1     | 0.0586 | 527.70  |

Final favourability model (step 12):

| Variables | $\beta$ | SE      | Sig | Evaluation metrics |           |
|-----------|---------|---------|-----|--------------------|-----------|
| Intercept | -9.19   | 5.42    | *   | AUC                | 0.991     |
| DP10Sum   | 1.04    | 0.088   | *** | Kappa              | 0.534     |
| TRan      | 0.351   | 0.0755  | *** | Sensitivity        | 0.995     |
| HPd       | -0.0552 | 0.0202  | **  | Specificity        | 0.942     |
| AET       | 0.00950 | 0.00240 | *** | CCR                | 0.944     |
| DTn20     | -0.129  | 0.0347  | *** | HL                 | 72.80 *** |
| DTn0Sum   | -1.15   | 0.304   | *** |                    |           |
| U500      | -0.0132 | 0.00354 | *** |                    |           |
| CTI       | -0.607  | 0.294   | *   |                    |           |
| SE        | 0.0340  | 0.0122  | **  |                    |           |
| DHi       | 0.0145  | 0.00802 | ns  |                    |           |
| Sil       | 1.38    | 0.541   | *   |                    |           |
| Calc      | 1.03    | 0.567   | ns  |                    |           |

## *Euproctus asper* (cont.)

Calibration plot:

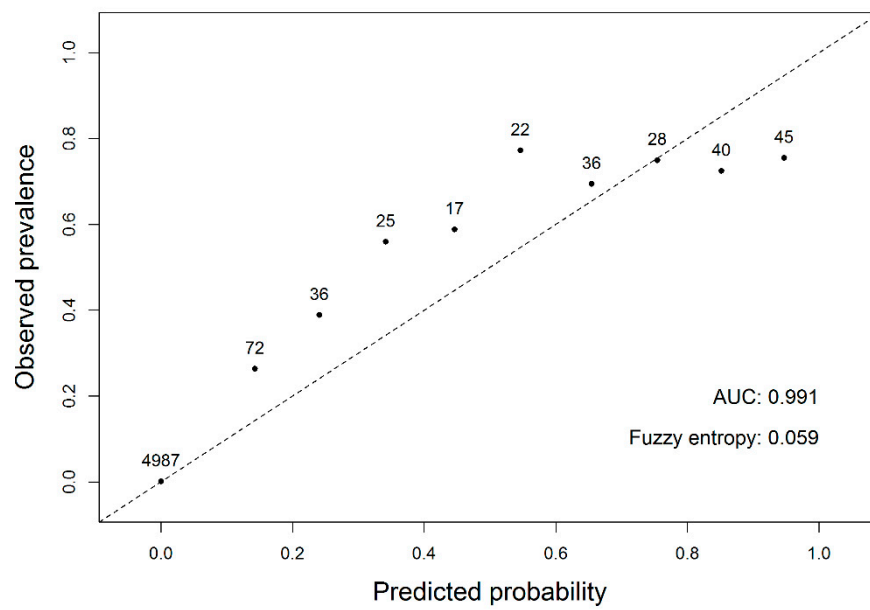

Distribution and favourability:

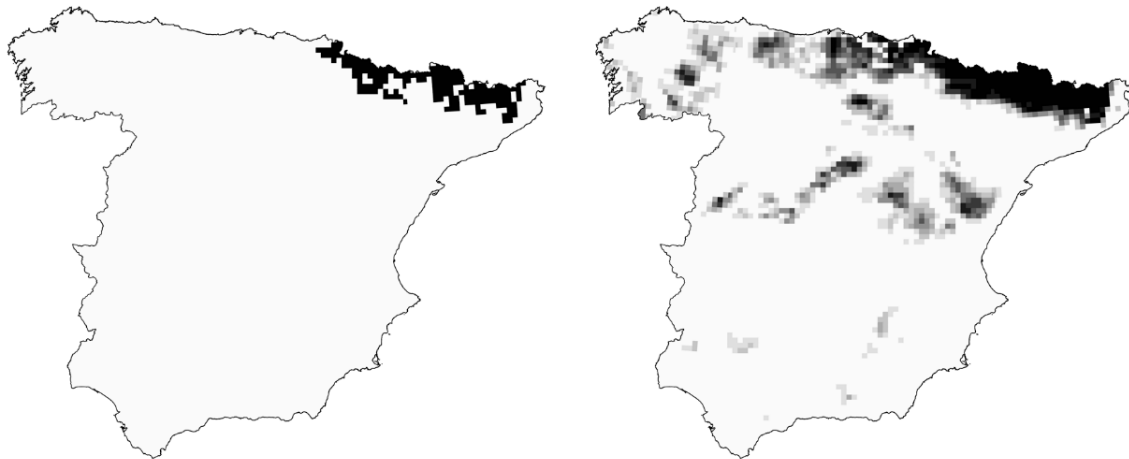

## *Triturus pygmaeus*

Entropy of each step:

| Step | Variable  | Cor_P  | H      | Cor_F  | R      | AIC     |
|------|-----------|--------|--------|--------|--------|---------|
| 0    | Intercept | -      | 8.58   | -      | 1      | 3177.88 |
| 1    | + SIDSum  | 0.753  | 7.79   | 0.892  | 0.216  | 2362.04 |
| 2    | + DP30Win | 0.901  | 7.61   | 0.960  | 0.174  | 2145.98 |
| 3    | + Sil     | 0.943  | 7.56   | 0.973  | 0.166  | 2098.12 |
| 4    | + Calc    | 0.956  | 7.55   | 0.978  | 0.165  | 2081.20 |
| 5    | + SE      | 0.966  | 7.54   | 0.983  | 0.167  | 2069.31 |
| 6    | + DTn20   | 0.971  | 7.53   | 0.987  | 0.162  | 2061.44 |
| 7    | + PSpr    | 0.978  | 7.52   | 0.990  | 0.159  | 2054.13 |
| 8    | + TRan    | 0.993  | 7.50   | 0.995  | 0.1523 | 2038.54 |
| 9    | + DP30Sum | 0.997  | 7.497  | 0.997  | 0.1516 | 2033.76 |
| 10   | + DTn0Spr | 0.9998 | 7.4925 | 0.9999 | 0.1502 | 2030.00 |
| 11   | - DP30Win | 1      | 7.4923 | 1      | 0.1498 | 2028.31 |

Final favourability model (step 11):

| Variables | $\beta$ | SE      | Sig | Evaluation metrics |          |
|-----------|---------|---------|-----|--------------------|----------|
| Intercept | -29.19  | 2.55    | *** | AUC                | 0.912    |
| SIDSum    | 4.99    | 0.450   | *** | Kappa              | 0.355    |
| Sil       | 1.25    | 0.180   | *** | Sensitivity        | 0.917    |
| Calc      | 1.16    | 0.276   | *** | Specificity        | 0.783    |
| SE        | 0.0152  | 0.00475 | **  | CCR                | 0.795    |
| DTn20     | 0.0105  | 0.00488 | *   | HL                 | 21.69 ** |
| PSpr      | 0.0169  | 0.00163 | *** |                    |          |
| TRan      | -0.163  | 0.0374  | *** |                    |          |
| DP30Sum   | -1.65   | 0.644   | *   |                    |          |
| DTn0Spr   | -0.0360 | 0.0142  | *   |                    |          |

## *Triturus pygmaeus* (cont.)

Calibration plot:

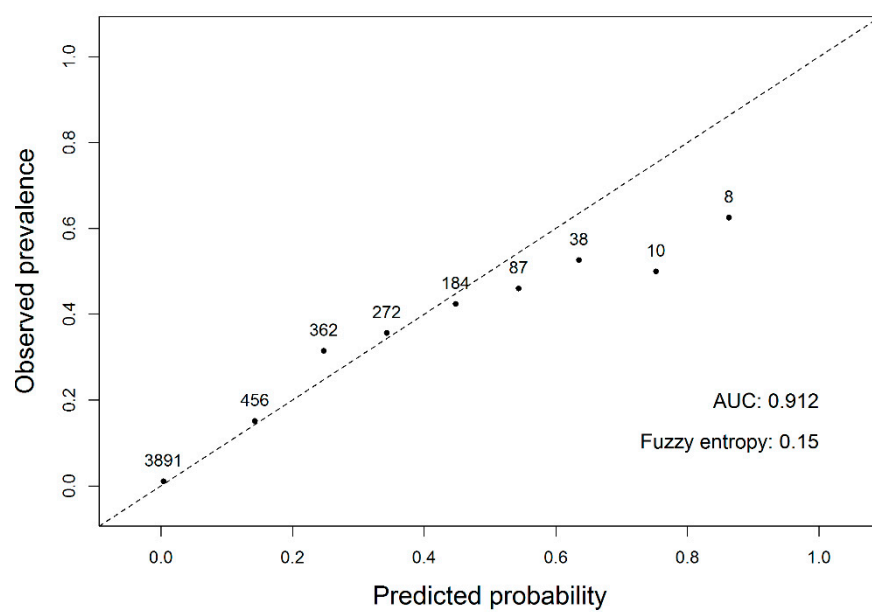

Distribution and favourability:

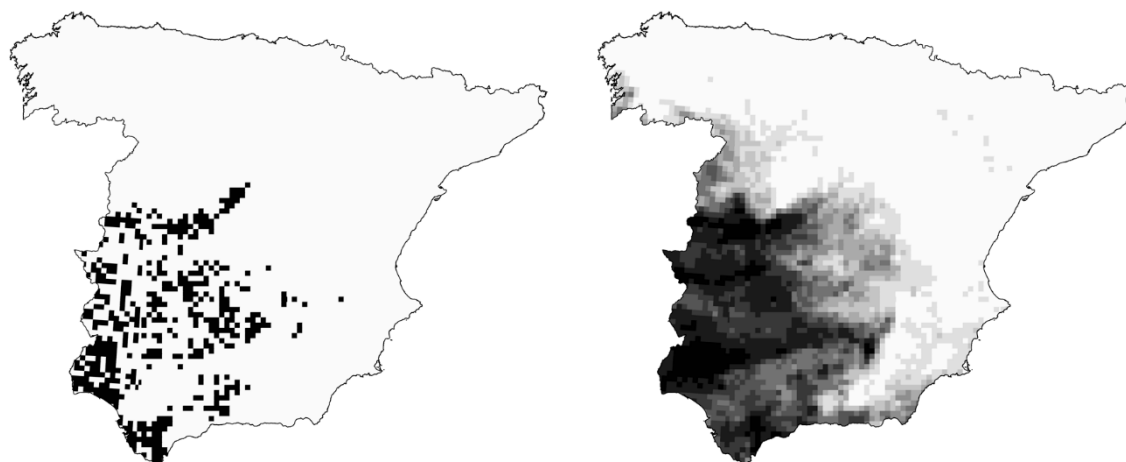

## *Alytes dickhilleni*

Entropy of each step:

| Step | Variable  | Cor_P | H    | Cor_F | R      | AIC     |
|------|-----------|-------|------|-------|--------|---------|
| 0    | Intercept | -     | 8.58 | -     | 1      | 1259.89 |
| 1    | + Slop    | 0.322 | 7.88 | 0.353 | 0.428  | 1060.62 |
| 2    | + SISWin  | 0.578 | 7.10 | 0.668 | 0.219  | 828.64  |
| 3    | + Alt     | 0.731 | 6.66 | 0.818 | 0.157  | 684.53  |
| 4    | + Sil     | 0.864 | 6.33 | 0.876 | 0.0985 | 590.49  |
| 5    | + DHi     | 0.917 | 6.15 | 0.929 | 0.0627 | 539.46  |
| 6    | + TRan    | 0.935 | 6.09 | 0.947 | 0.0589 | 520.94  |
| 7    | + TnWin   | 0.973 | 6.01 | 0.963 | 0.0572 | 491.15  |
| 8    | + U500    | 0.977 | 5.99 | 0.976 | 0.0580 | 487.91  |
| 9    | + AET     | 0.987 | 5.97 | 0.990 | 0.0579 | 480.31  |
| 10   | + U100    | 0.992 | 5.95 | 0.994 | 0.0540 | 477.29  |
| 11   | + Clay    | 0.997 | 5.94 | 0.997 | 0.0531 | 475.67  |
| 12   | + DP30Sum | 1     | 5.93 | 1     | 0.0507 | 474.28  |

Final favourability model (step 12):

| Variables | $\beta$ | SE       | Sig | Evaluation metrics |         |
|-----------|---------|----------|-----|--------------------|---------|
| Intercept | -56.8   | 6.34     | *** | AUC                | 0.987   |
| Slop      | 0.340   | 0.0556   | *** | Kappa              | 0.434   |
| SISWin    | 12.31   | 1.63     | *** | Sensitivity        | 0.985   |
| Alt       | 0.00663 | 0.000949 | *** | Specificity        | 0.939   |
| Sil       | -3.09   | 0.567    | *** | CCR                | 0.940   |
| DHi       | 0.0477  | 0.0121   | *** | HL                 | 18.15 * |
| TRan      | 0.600   | 0.131    | *** |                    |         |
| TnWin     | 0.536   | 0.149    | *** |                    |         |
| U500      | 0.0142  | 0.00354  | *** |                    |         |
| AET       | 0.00441 | 0.00132  | *** |                    |         |
| U100      | -0.0151 | 0.00728  | *   |                    |         |
| Clay      | 0.986   | 0.493    | *   |                    |         |
| DP30Sum   | 1.09    | 0.588    | ns  |                    |         |

## *Alytes dickhilleni* (cont.)

Calibration plot:

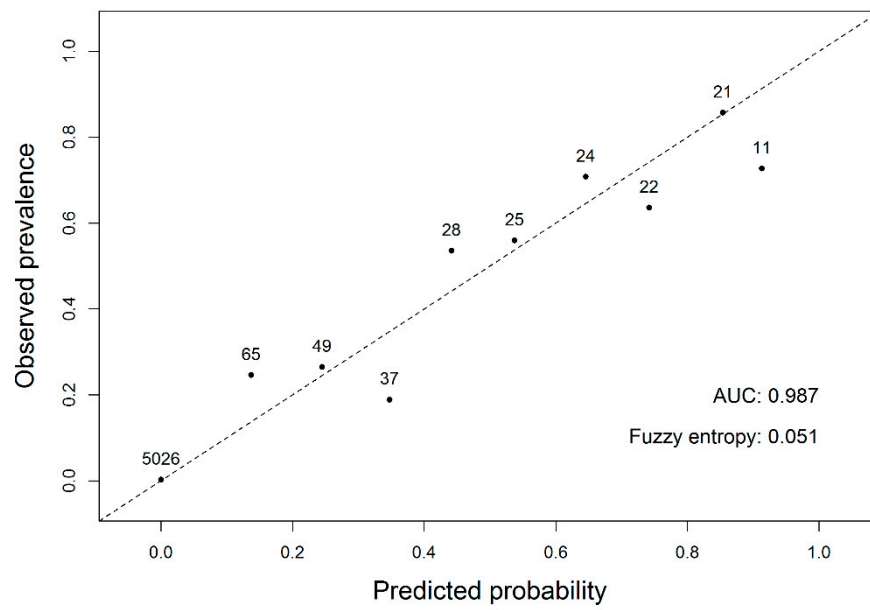

Distribution and favourability:

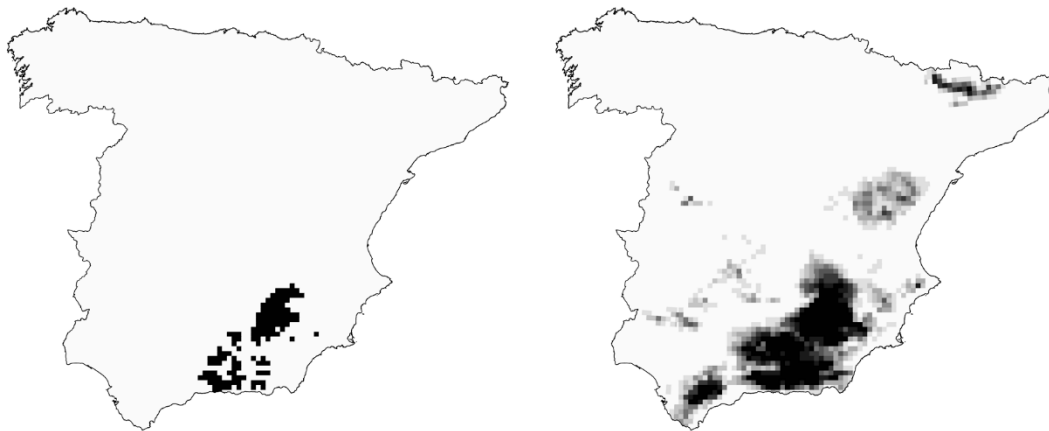



## *Rana pyrenaica*

Entropy of each step:

| Step | Variable  | Cor_P | H    | Cor_F | R      | AIC    |
|------|-----------|-------|------|-------|--------|--------|
| 0    | Intercept | -     | 8.58 | -     | 1      | 309.04 |
| 1    | + DP10Sum | 0.537 | 5.69 | 0.513 | 0.0996 | 167.66 |
| 2    | + HPd     | 0.627 | 5.21 | 0.620 | 0.0456 | 144.84 |
| 3    | + Calc    | 0.828 | 4.86 | 0.630 | 0.0357 | 125.24 |
| 4    | + DP10Spr | 0.921 | 4.61 | 0.666 | 0.0280 | 112.21 |
| 5    | + U100    | 0.945 | 4.47 | 0.728 | 0.0270 | 103.68 |
| 6    | + TxAut   | 0.960 | 4.37 | 0.773 | 0.0220 | 101.06 |
| 7    | + AET     | 0.976 | 4.29 | 0.803 | 0.0248 | 97.44  |
| 8    | + Grav    | 0.985 | 4.20 | 0.935 | 0.0198 | 94.12  |
| 9    | + DHi     | 0.992 | 4.15 | 0.970 | 0.0170 | 93.66  |
| 10   | + Clay    | 1     | 4.11 | 1     | 0.0159 | 93.19  |

Final favourability model (step 10):

| Variables | $\beta$   | SE        | Sig | Evaluation metrics |         |
|-----------|-----------|-----------|-----|--------------------|---------|
| Intercept | -24.50    | 7.65      | *** | AUC                | 0.997   |
| DP10Sum   | 0.695     | 0.297     | *   | Kappa              | 0.243   |
| HPd       | -0.989    | 0.463     | *   | Sensitivity        | 0.958   |
| Calc      | 3.25      | 0.907     | *** | Specificity        | 0.974   |
| DP10Spr   | 0.755     | 0.185     | *** | CCR                | 0.974   |
| U100      | 0.0796    | 0.0232    | *** | HL                 | 6.82 ns |
| TxAut     | 0.855     | 0.268     | **  |                    |         |
| AET       | -0.0143   | 0.00625   | *   |                    |         |
| Grav      | -0.000243 | 0.0000121 | ns  |                    |         |
| DHi       | 0.0413    | 0.0264    | ns  |                    |         |
| Clay      | -5.93     | 4.92      | ns  |                    |         |

## *Rana pyrenaica* (cont.)

Calibration plot:

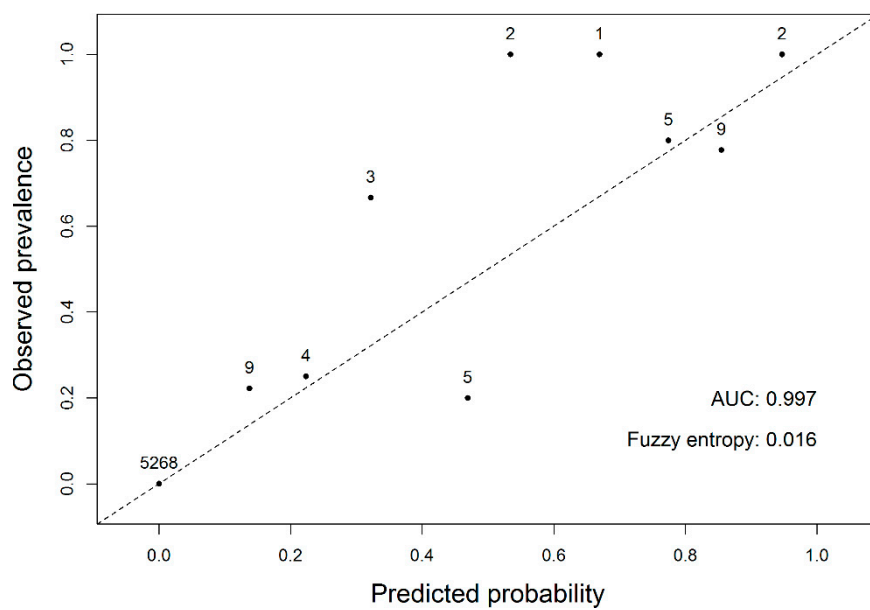

Distribution and favourability:

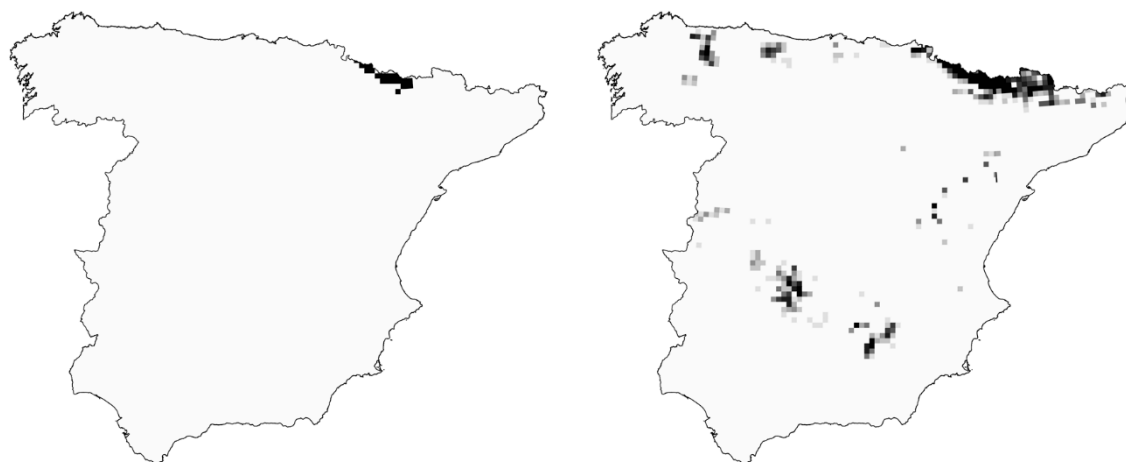

## *Chalcides bedriagai*

Entropy of each step:

| Step | Variable  | Cor_P | H     | Cor_F | R      | AIC     |
|------|-----------|-------|-------|-------|--------|---------|
| 0    | Intercept | -     | 8.58  | -     | 1      | 3768.07 |
| 1    | + SISWin  | 0.688 | 8.36  | 0.691 | 0.513  | 3470.59 |
| 2    | + TRan    | 0.831 | 8.29  | 0.807 | 0.497  | 3357.67 |
| 3    | + Clay    | 0.897 | 8.25  | 0.856 | 0.473  | 3304.01 |
| 4    | + Alt     | 0.919 | 8.23  | 0.896 | 0.463  | 3274.26 |
| 5    | + U500    | 0.952 | 8.20  | 0.932 | 0.440  | 3239.23 |
| 6    | + Gyps    | 0.955 | 8.192 | 0.953 | 0.432  | 3229.89 |
| 7    | + PSpr    | 0.967 | 8.185 | 0.964 | 0.429  | 3219.77 |
| 8    | + TxJan   | 0.977 | 8.175 | 0.980 | 0.422  | 3208.53 |
| 9    | + U100    | 0.985 | 8.168 | 0.988 | 0.414  | 3201.58 |
| 10   | + Grav    | 0.989 | 8.165 | 0.991 | 0.4130 | 3199.49 |
| 11   | + DTn20   | 0.994 | 8.164 | 0.992 | 0.415  | 3197.97 |
| 12   | + DTn0Sum | 0.997 | 8.161 | 0.997 | 0.4135 | 3195.70 |
| 13   | + DAlt    | 1     | 8.159 | 1     | 0.411  | 3194.63 |

Final favourability model (step 13):

| Variables | $\beta$   | SE       | Sig | Evaluation metrics |          |
|-----------|-----------|----------|-----|--------------------|----------|
| Intercept | -0.417    | 0.962    | *   | AUC                | 0.789    |
| SISWin    | 1.04      | 0.441    | *   | Kappa              | 0.263    |
| TRan      | -0.271    | 0.0371   | *** | Sensitivity        | 0.736    |
| Clay      | -1.57     | 0.206    | *** | Specificity        | 0.734    |
| Alt       | 0.00241   | 0.000387 | *** | CCR                | 0.734    |
| U500      | -0.00724  | 0.000910 | *** | HL                 | 21.71 ** |
| Gyps      | -2.59     | 1.22     | *   |                    |          |
| PSpr      | -0.00489  | 0.00131  | *** |                    |          |
| TxJan     | 0.244     | 0.0713   | *** |                    |          |
| U100      | 0.00487   | 0.00205  | *   |                    |          |
| Grav      | -0.429    | 0.227    | ns  |                    |          |
| DTn20     | 0.0103    | 0.00402  | *   |                    |          |
| DTn0Sum   | -0.645    | 0.342    | ns  |                    |          |
| DAlt      | -0.000364 | 0.000209 | ns  |                    |          |

## *Chalcides bedriagai* (cont.)

Calibration plot:

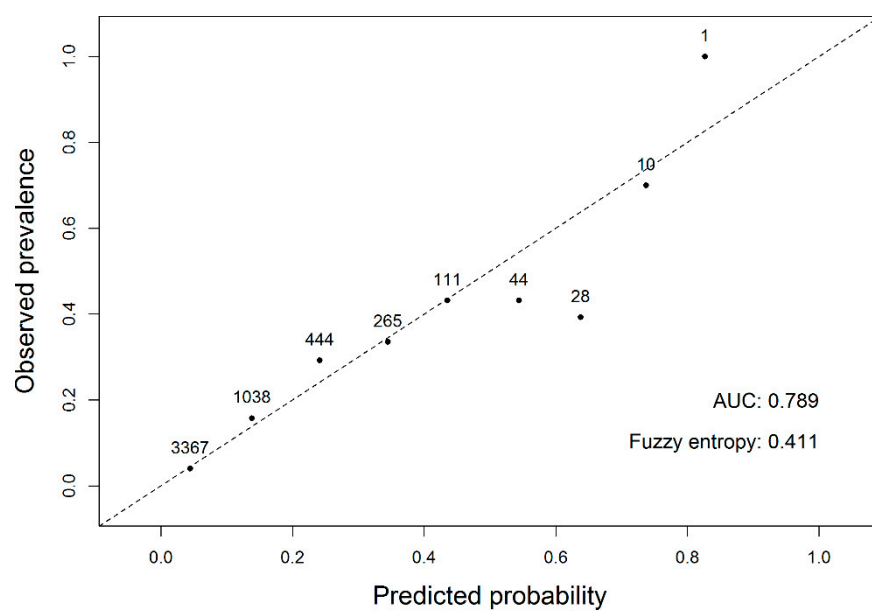

Distribution and favourability:

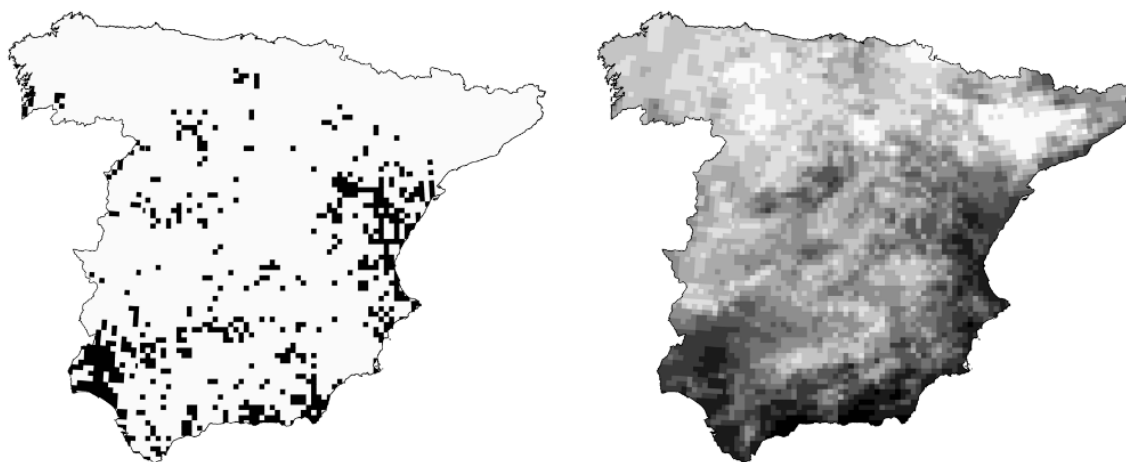

## *Algyroides marchi*

### Entropy of each step:

| Step | Variable   | Cor_P | H     | Cor_F | R       | AIC    |
|------|------------|-------|-------|-------|---------|--------|
| 0    | Intercept  | -     | 8.58  | -     | 1       | 372.38 |
| 1    | + Calc     | 0.169 | 7.39  | 0.224 | 0.1897  | 302.57 |
| 2    | + U500     | 0.621 | 5.61  | 0.406 | 0.0729  | 190.01 |
| 3    | + AET      | 0.740 | 5.19  | 0.446 | 0.0618  | 161.07 |
| 4    | + Alt      | 0.837 | 4.85  | 0.468 | 0.0469  | 137.66 |
| 5    | + SISSum   | 0.884 | 4.54  | 0.638 | 0.0465  | 116.82 |
| 6    | + Grav     | 0.908 | 4.43  | 0.692 | 0.0391  | 110.61 |
| 7    | + CTI      | 0.927 | 4.37  | 0.721 | 0.0378  | 107.92 |
| 8    | + Sil      | 0.940 | 4.28  | 0.839 | 0.0265  | 104.18 |
| 9    | + U100     | 0.971 | 4.14  | 0.906 | 0.0119  | 96.53  |
| 10   | + DTn20Aut | 0.994 | 4.090 | 0.990 | 0.00871 | 94.47  |
| 11   | - Calc     | 0.996 | 4.095 | 0.992 | 0.00848 | 92.91  |
| 12   | - Alt      | 1     | 4.12  | 1     | 0.00863 | 92.08  |

### Favourability model of step 11:

| Variables | $\beta$ | SE      | Sig | Evaluation metrics |          |
|-----------|---------|---------|-----|--------------------|----------|
| Intercept | -20.54  | 18.57   | ns  | AUC                | 0.999    |
| U500      | 0.0665  | 0.0181  | *** | Kappa              | 0.433    |
| AET       | 0.0103  | 0.00394 | **  | Sensitivity        | 1        |
| Alt       | 0.00156 | 0.00145 | ns  | Specificity        | 0.985    |
| SISSum    | 7.16    | 2.09    | *** | CCR                | 0.985    |
| Grav      | -38.74  | 28.06   | ns  | HL                 | 14.56 ns |
| CTI       | -2.69   | 0.878   | **  |                    |          |
| Sil       | -9.60   | 3.10    | **  |                    |          |
| U100      | -0.0541 | 0.0210  | *   |                    |          |
| DTn20Aut  | -0.689  | 0.402   | ns  |                    |          |

### Final favourability model (step 12):

| Variables | $\beta$ | SE      | Sig | Evaluation metrics |         |
|-----------|---------|---------|-----|--------------------|---------|
| Intercept | -18.32  | 17.01   | ns  | AUC                | 0.999   |
| U500      | 0.0631  | 0.0168  | *** | Kappa              | 0.433   |
| AET       | 0.0101  | 0.00382 | **  | Sensitivity        | 1       |
| SISSum    | 7.70    | 1.90    | *** | Specificity        | 0.985   |
| Grav      | -37.16  | 26.75   | ns  | CCR                | 0.985   |
| CTI       | -2.94   | 0.864   | *** | HL                 | 9.16 ns |
| Sil       | -10.55  | 3.29    | **  |                    |         |
| U100      | -0.0473 | 0.0195  | *   |                    |         |
| DTn20Aut  | -0.938  | 0.354   | **  |                    |         |

## *Algyroides marchi* (cont.)

Calibration plots:

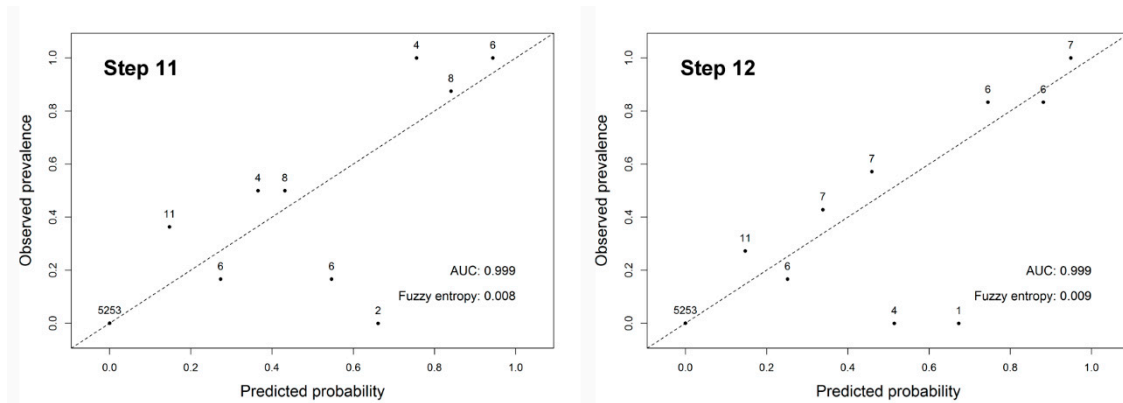

Distribution and favourability:

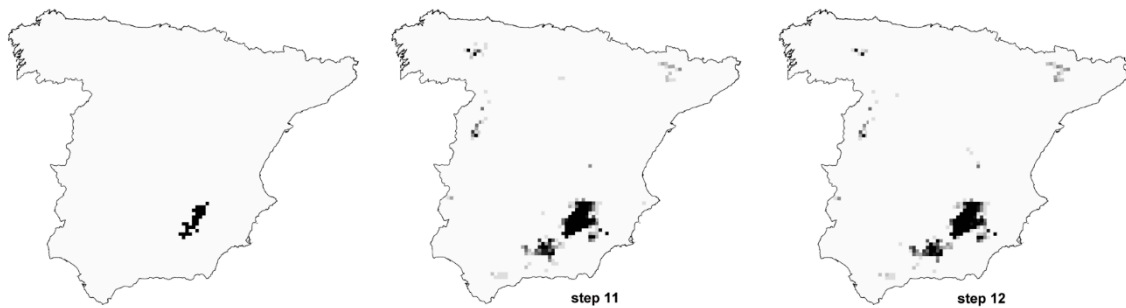

## *Iberolacerta bonnali*

### Entropy of each step:

| Step | Variable  | Cor_P | H    | Cor_F | R       | AIC    |
|------|-----------|-------|------|-------|---------|--------|
| 0    | Intercept | -     | 8.58 | -     | 1       | 319.79 |
| 1    | + TxAut   | 0.821 | 4.49 | 0.643 | 0.0340  | 98.48  |
| 2    | + DP10Sum | 0.894 | 4.18 | 0.787 | 0.0198  | 83.36  |
| 3    | + SE      | 0.935 | 4.06 | 0.829 | 0.0150  | 77.71  |
| 4    | + U100    | 0.940 | 3.93 | 0.895 | 0.00632 | 71.64  |
| 5    | + Alt     | 0.955 | 3.85 | 0.910 | 0.00445 | 68.73  |
| 6    | + DTn0Sum | 0.970 | 3.82 | 0.961 | 0.00637 | 66.22  |
| 7    | - TxAut   | 0.972 | 3.83 | 0.962 | 0.00664 | 64.64  |
| 8    | + DHi     | 0.983 | 3.79 | 0.968 | 0.00586 | 64.48  |
| 9    | + Sil     | 0.994 | 3.77 | 0.985 | 0.00456 | 64.29  |
| 10   | - U100    | 1     | 3.80 | 1     | 0.00565 | 64.00  |

### Favourability model of step 5:

| Variables | $\beta$ | SE      | Sig | Evaluation metrics |         |
|-----------|---------|---------|-----|--------------------|---------|
| Intercept | -16.38  | 11.25   | ns  | AUC                | 0.999   |
| TxAut     | 0.107   | 0.391   | ns  | Kappa              | 0.438   |
| DP10Sum   | 1.83    | 0.532   | *** | Sensitivity        | 1       |
| SE        | -0.115  | 0.0369  | **  | Specificity        | 0.988   |
| U100      | 0.0661  | 0.0260  | *   | CCR                | 0.988   |
| Alt       | 0.00313 | 0.00173 | ns  | HL                 | 4.23 ns |

### Final favourability model (step 10):

| Variables | $\beta$ | SE      | Sig | Evaluation metrics |          |
|-----------|---------|---------|-----|--------------------|----------|
| Intercept | -8.88   | 4.24    | *** | AUC                | 0.999    |
| DP10Sum   | 1.10    | 0.329   | *** | Kappa              | 0.468    |
| SE        | -0.135  | 0.0408  | *** | Sensitivity        | 1        |
| Alt       | 0.00352 | 0.00127 | **  | Specificity        | 0.989    |
| DTn0Sum   | 2.93    | 0.914   | **  | CCR                | 0.989    |
| DHi       | 0.0728  | 0.0366  | *   | HL                 | 12.38 ns |
| Sil       | 2.22    | 1.38    | ns  |                    |          |

## *Iberolacerta bonnali* (cont.)

Calibration plots:

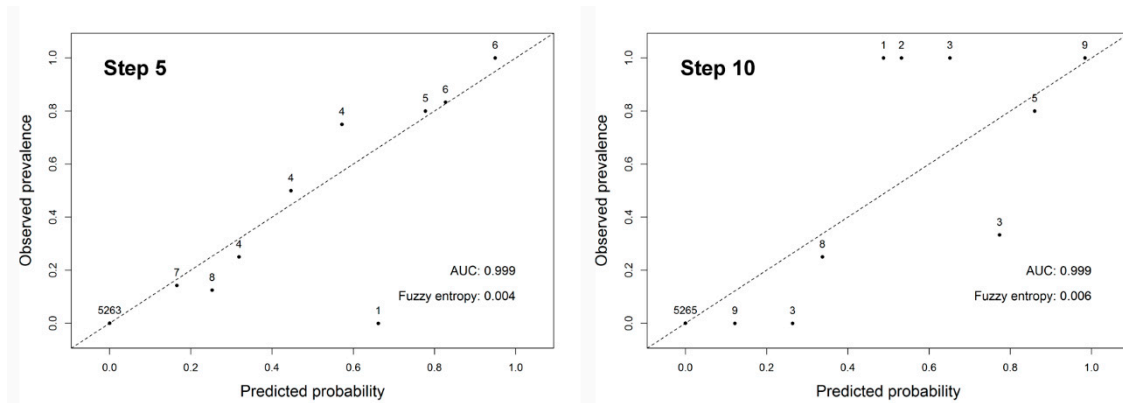

Distribution and favourability:

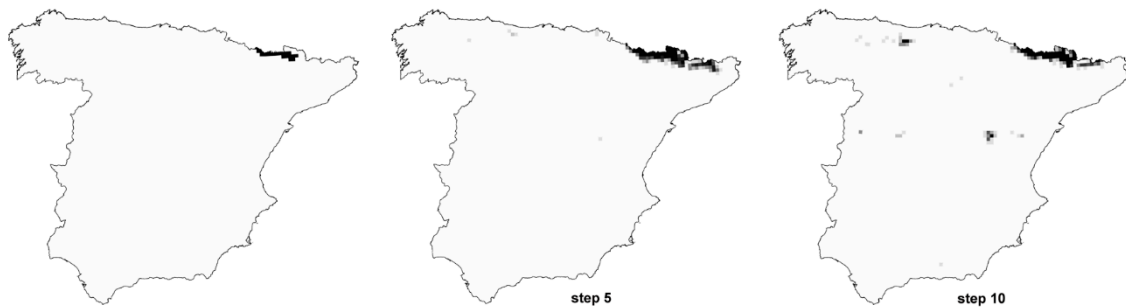



## *Lacerta schreiberi*

### Entropy of each step:

| Step | Variable  | Cor_P | H     | Cor_F | R       | AIC     |
|------|-----------|-------|-------|-------|---------|---------|
| 0    | Intercept | -     | 8.58  | -     | 1       | 3647.54 |
| 1    | + DP1Win  | 0.820 | 7.68  | 0.840 | 0.234   | 2341.46 |
| 2    | + Sil     | 0.881 | 7.56  | 0.837 | 0.217   | 2175.65 |
| 3    | + PET     | 0.908 | 7.46  | 0.906 | 0.179   | 2049.41 |
| 4    | + AET     | 0.936 | 7.32  | 0.952 | 0.118   | 1908.60 |
| 5    | + DP30Sum | 0.971 | 7.27  | 0.975 | 0.113   | 1821.27 |
| 6    | + DHi     | 0.978 | 7.26  | 0.983 | 0.111   | 1797.80 |
| 7    | + DP30Spr | 0.985 | 7.25  | 0.987 | 0.109   | 1782.21 |
| 8    | + Alt     | 0.990 | 7.24  | 0.989 | 0.107   | 1772.64 |
| 9    | + Gyps    | 0.990 | 7.23  | 0.994 | 0.105   | 1767.40 |
| 10   | + DAlt    | 0.993 | 7.227 | 0.995 | 0.1037  | 1762.99 |
| 11   | + Calc    | 0.995 | 7.222 | 0.996 | 0.1036  | 1758.54 |
| 12   | + SE      | 0.997 | 7.218 | 0.997 | 0.1022  | 1754.82 |
| 13   | + DTn20   | 0.998 | 7.215 | 0.999 | 0.10178 | 1752.70 |
| 14   | + Clay    | 0.999 | 7.213 | 0.999 | 0.10184 | 1751.44 |
| 15   | + U100    | 1     | 7.212 | 1     | 0.10187 | 1751.20 |

### Favourability model of step 13:

| Variables | $\beta$   | SE        | Sig | Evaluation metrics |          |
|-----------|-----------|-----------|-----|--------------------|----------|
| Intercept | 6.34      | 1.49      | **  | AUC                | 0.954    |
| DP1Win    | 0.0528    | 0.0121    | *** | Kappa              | 0.547    |
| Sil       | 1.23      | 0.238     | *** | Sensitivity        | 0.927    |
| PET       | -0.0208   | 0.002     | *** | Specificity        | 0.866    |
| AET       | 0.0140    | 0.00159   | *** | CCR                | 0.873    |
| DP30Sum   | -1.73     | 0.197     | *** | HL                 | 10.31 ns |
| DHi       | -0.0137   | 0.00308   | *** |                    |          |
| DP30Spr   | 0.399     | 0.0975    | *** |                    |          |
| Alt       | -0.000974 | 0.000253  | *** |                    |          |
| Gyps      | -62990.00 | 449900.00 | ns  |                    |          |
| DAlt      | 0.000748  | 0.000242  | **  |                    |          |
| Calc      | -0.895    | 0.345     | **  |                    |          |
| SE        | -0.0113   | 0.00528   | *   |                    |          |
| DTn20     | -0.0224   | 0.0113    | *   |                    |          |

## *Lacerta schreiberi* (cont.)

### Final favourability model (step 15):

| Variables | $\beta$   | SE        | Sig | Evaluation metrics |          |
|-----------|-----------|-----------|-----|--------------------|----------|
| Intercept | 7.07      | 1.58      | **  | AUC                | 0.954    |
| DP1Win    | 0.0503    | 0.0122    | *** | Kappa              | 0.549    |
| Sil       | 0.650     | 0.389     | ns  | Sensitivity        | 0.927    |
| PET       | -0.0211   | 0.00203   | *** | Specificity        | 0.867    |
| AET       | 0.0140    | 0.00161   | *** | CCR                | 0.874    |
| DP30Sum   | -1.73     | 0.196     | *** | HL                 | 11.89 ns |
| DHi       | -0.0156   | 0.00332   | *** |                    |          |
| DP30Spr   | 0.423     | 0.0987    | *** |                    |          |
| Alt       | -0.00103  | 0.000255  | *** |                    |          |
| Gyps      | -63930.00 | 451400.00 | ns  |                    |          |
| DAlt      | 0.000801  | 0.000243  | *** |                    |          |
| Calc      | -1.40     | 0.450     | **  |                    |          |
| SE        | -0.0119   | 0.00529   | *   |                    |          |
| DTn20     | -0.0246   | 0.0118    | *   |                    |          |
| Clay      | -0.919    | 0.524     | ns  |                    |          |
| U100      | 0.00375   | 0.00250   | ns  |                    |          |

### Calibration plots:

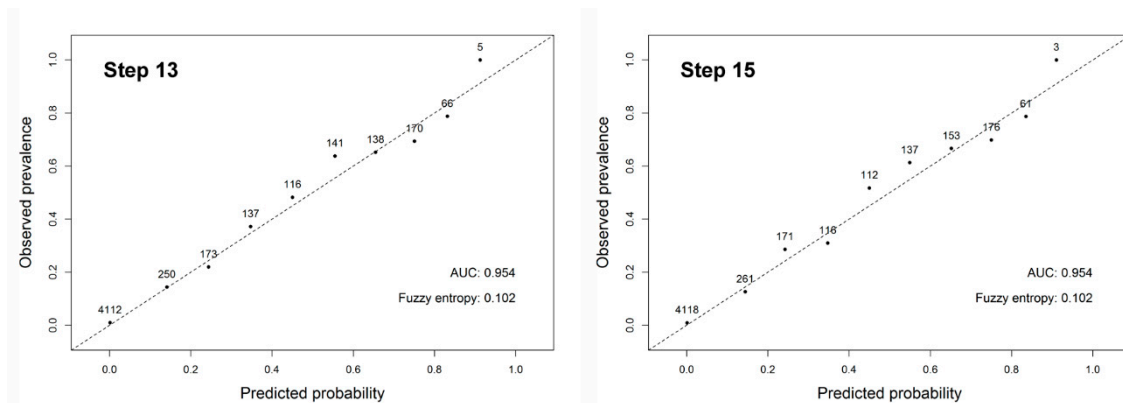

### Distribution and favourability:

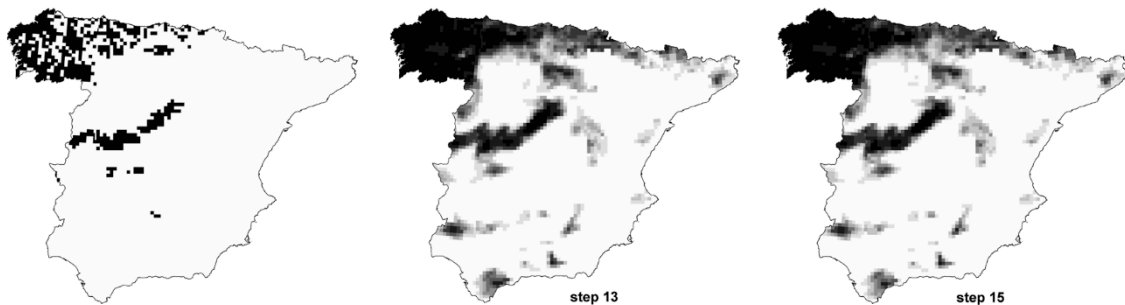

## *Aquila adalberti*

### Entropy of each step:

| Step | Variable  | Cor_P | H      | Cor_F | R      | AIC     |
|------|-----------|-------|--------|-------|--------|---------|
| 0    | Intercept | -     | 8.58   | -     | 1      | 1423.79 |
| 1    | + SIDSum  | 0.485 | 7.96   | 0.725 | 0.291  | 1223.85 |
| 2    | + Sil     | 0.707 | 7.65   | 0.847 | 0.233  | 1123.37 |
| 3    | + TRan    | 0.812 | 7.53   | 0.896 | 0.213  | 1081.45 |
| 4    | + AET     | 0.880 | 7.47   | 0.901 | 0.203  | 1062.65 |
| 5    | + Calc    | 0.892 | 7.12   | 0.938 | 0.190  | 1047.84 |
| 6    | + DP30Sum | 0.918 | 7.38   | 0.960 | 0.183  | 1036.32 |
| 7    | + SIDWin  | 0.945 | 7.35   | 0.965 | 0.182  | 1029.56 |
| 8    | + DTn20   | 0.967 | 7.33   | 0.975 | 0.171  | 1022.36 |
| 9    | + DP30Spr | 0.985 | 7.31   | 0.980 | 0.174  | 1017.41 |
| 10   | + Grav    | 0.994 | 7.2897 | 0.991 | 0.1723 | 1012.33 |
| 11   | - SIDSum  | 0.994 | 7.2895 | 0.991 | 0.1716 | 1010.38 |
| 12   | + Gyps    | 0.994 | 7.281  | 0.998 | 0.168  | 1009.64 |
| 13   | + DHi     | 1     | 7.277  | 1     | 0.1721 | 1009.37 |

### Favourability model of step 12:

| Variables | ß         | SE        | Sig | Evaluation metrics |         |
|-----------|-----------|-----------|-----|--------------------|---------|
| Intercept | -19.46    | 2.04      | *** | AUC                | 0.910   |
| Sil       | 2.03      | 0.416     | *** | Kappa              | 0.150   |
| TRan      | 0.621     | 0.0765    | *** | Sensitivity        | 0.842   |
| AET       | 0.00665   | 0.000934  | *** | Specificity        | 0.791   |
| Calc      | -2.33     | 0.757     | **  | CCR                | 0.792   |
| DP30Sum   | -1.65     | 0.816     | *   | HL                 | 3.86 ns |
| SIDWin    | 2.76      | 0.618     | *** |                    |         |
| DTn20     | -0.0298   | 0.00994   | **  |                    |         |
| DP30Spr   | -0.671    | 0.249     | **  |                    |         |
| Grav      | 1.74      | 0.652     | **  |                    |         |
| Gyps      | -40680.00 | 485400.00 | ns  |                    |         |

### Final favourability model (step 13):

| Variables | ß         | SE        | Sig | Evaluation metrics |         |
|-----------|-----------|-----------|-----|--------------------|---------|
| Intercept | -18.90    | 2.03      | *** | AUC                | 0.910   |
| Sil       | 2.13      | 0.422     | *** | Kappa              | 0.151   |
| TRan      | 0.613     | 0.0757    | *** | Sensitivity        | 0.861   |
| AET       | 0.00655   | 0.000934  | *** | Specificity        | 0.788   |
| Calc      | -2.26     | 0.759     | **  | CCR                | 0.790   |
| DP30Sum   | -1.64     | 0.817     | *   | HL                 | 2.51 ns |
| SIDWin    | 2.63      | 0.616     | *** |                    |         |
| DTn20     | -0.0293   | 0.00997   | **  |                    |         |
| DP30Spr   | -0.677    | 0.250     | **  |                    |         |
| Grav      | 1.62      | 0.660     | *   |                    |         |
| Gyps      | -40490.00 | 486800.00 | ns  |                    |         |
| DHi       | -0.00591  | 0.00397   | ns  |                    |         |

## *Aquila adalberti* (cont.)

Calibration plots:

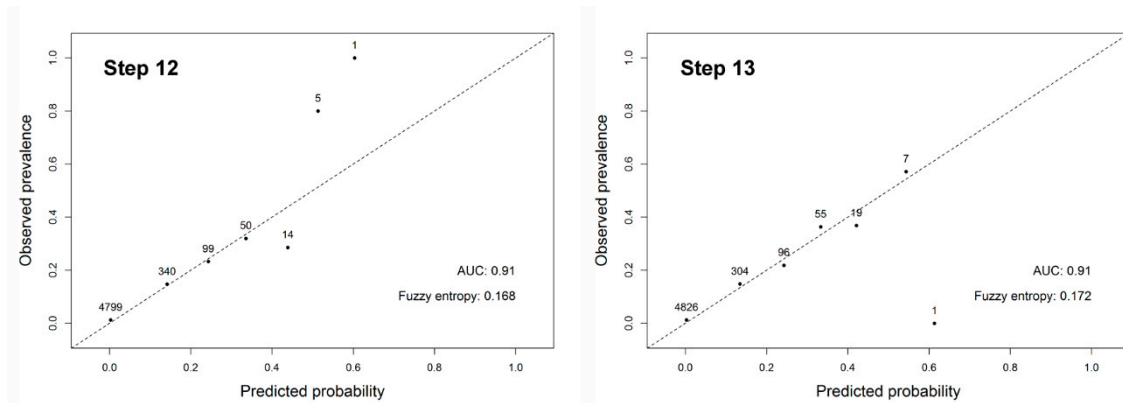

Distribution and favourability:

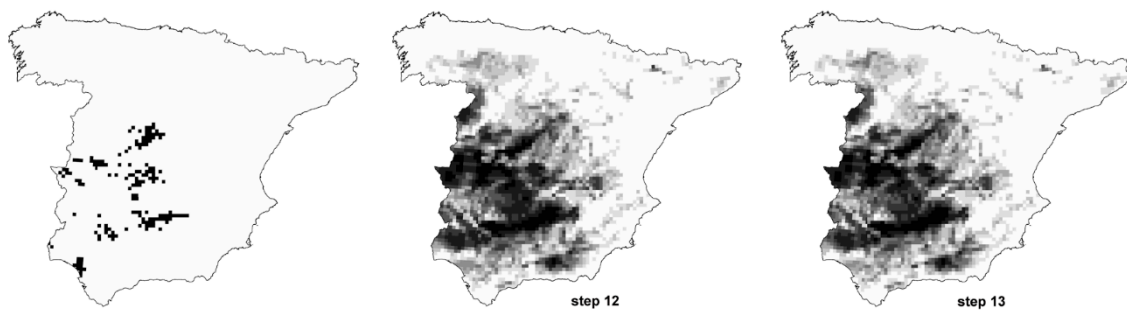

## *Caprimulgus ruficollis*

Entropy of each step:

| Step | Variable   | Cor_P | H      | Cor_F | R      | AIC     |
|------|------------|-------|--------|-------|--------|---------|
| 0    | Intercept  | -     | 8.58   | -     | 1      | 6696.10 |
| 1    | + DP01Sum  | 0.889 | 8.27   | 0.912 | 0.338  | 5172.94 |
| 2    | + U500     | 0.924 | 8.25   | 0.946 | 0.332  | 5049.78 |
| 3    | + TRan     | 0.956 | 8.22   | 0.963 | 0.307  | 4944.54 |
| 4    | + DTn0Spr  | 0.975 | 8.21   | 0.984 | 0.290  | 4863.48 |
| 5    | + U100     | 0.981 | 8.20   | 0.987 | 0.288  | 4846.61 |
| 6    | + DTx25Spr | 0.986 | 8.195  | 0.990 | 0.285  | 4828.23 |
| 7    | + DHi      | 0.989 | 8.193  | 0.992 | 0.2818 | 4820.44 |
| 8    | + Gyps     | 0.991 | 8.192  | 0.994 | 0.2817 | 4815.57 |
| 9    | + SE       | 0.993 | 8.190  | 0.996 | 0.2803 | 4809.22 |
| 10   | + Calc     | 0.995 | 8.1899 | 0.997 | 0.2804 | 4804.16 |
| 11   | + Clay     | 0.997 | 8.1891 | 0.998 | 0.2801 | 4801.97 |
| 12   | + PSpr     | 0.998 | 8.187  | 0.999 | 0.279  | 4799.02 |
| 13   | + CTI      | 1     | 8.185  | 1     | 0.278  | 4794.28 |

Final favourability model (step 13):

| Variables | $\beta$  | SE       | Sig | Evaluation metrics |          |
|-----------|----------|----------|-----|--------------------|----------|
| Intercept | 0.506    | 0.928    | ns  | AUC                | 0.834    |
| DP01Sum   | -0.203   | 0.0140   | *** | Kappa              | 0.475    |
| U500      | -0.00627 | 0.000735 | *** | Sensitivity        | 0.857    |
| TRan      | 0.332    | 0.0258   | *** | Specificity        | 0.682    |
| DTn0Spr   | -0.0603  | 0.00659  | *** | CCR                | 0.739    |
| U100      | -0.00530 | 0.00147  | *** | HL                 | 21.11 ** |
| DTx25Spr  | -0.0357  | 0.00763  | *** |                    |          |
| DHi       | -0.00544 | 0.00191  | **  |                    |          |
| Gyps      | -1.35    | 0.362    | *** |                    |          |
| SE        | 0.00618  | 0.00268  | *   |                    |          |
| Calc      | -0.480   | 0.131    | *** |                    |          |
| Clay      | -0.351   | 0.144    | *   |                    |          |
| PSpr      | -0.00330 | 0.00110  | **  |                    |          |
| CTI       | -0.107   | 0.0412   | **  |                    |          |

## *Caprimulgus ruficollis* (cont.)

Calibration plot:

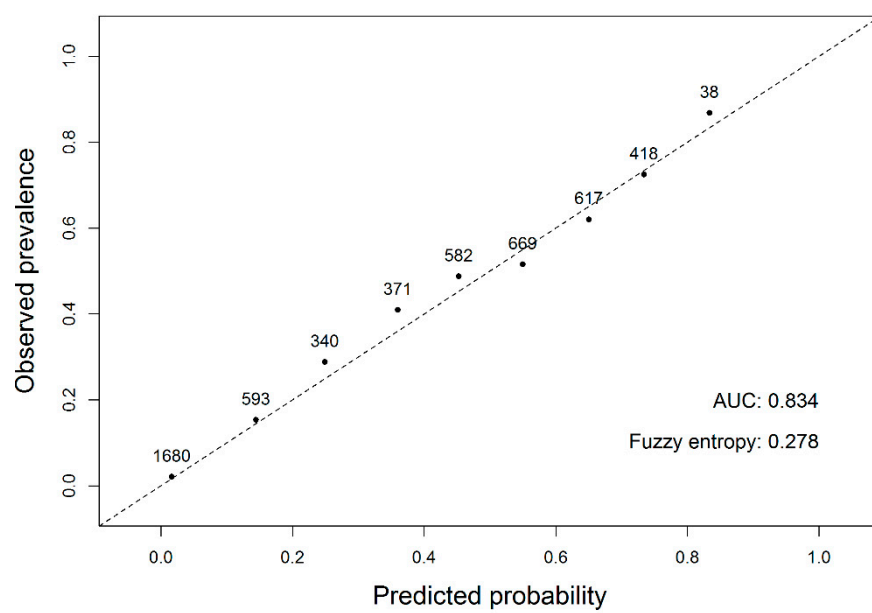

Distribution and favourability:

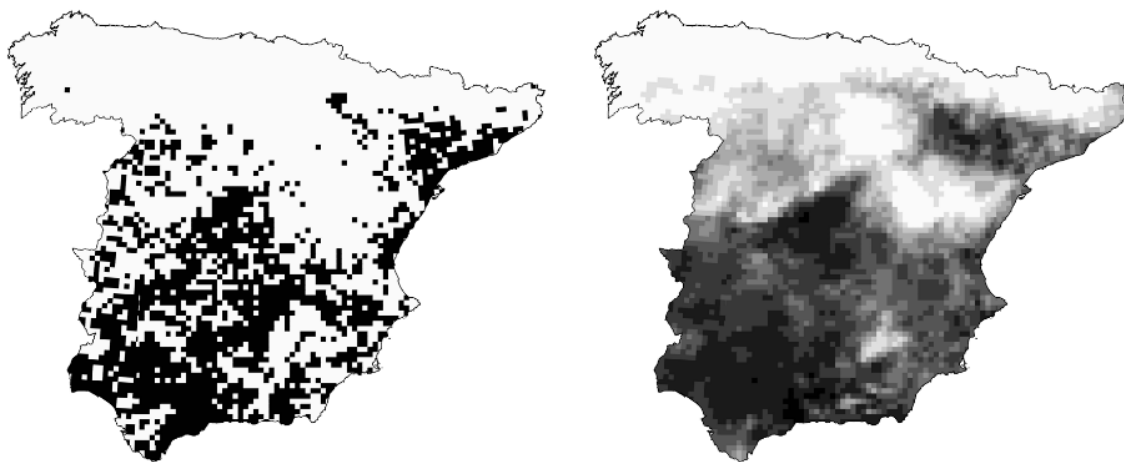

## *Chersophilus duponti*

Entropy of each step:

| Step | Variable  | Cor_P | H     | Cor_F | R      | AIC     |
|------|-----------|-------|-------|-------|--------|---------|
| 0    | Intercept | -     | 8.58  | -     | 1      | 1938.88 |
| 1    | + PWin    | 0.542 | 7.93  | 0.759 | 0.291  | 1618.35 |
| 2    | + PET     | 0.866 | 7.60  | 0.879 | 0.213  | 1442.39 |
| 3    | + U100    | 0.912 | 7.54  | 0.904 | 0.223  | 1407.87 |
| 4    | + U500    | 0.937 | 7.49  | 0.925 | 0.217  | 1384.53 |
| 5    | + Slop    | 0.950 | 7.46  | 0.945 | 0.205  | 1372.64 |
| 6    | + HPd     | 0.961 | 7.43  | 0.973 | 0.193  | 1358.84 |
| 7    | + WE      | 0.969 | 7.42  | 0.977 | 0.195  | 1353.92 |
| 8    | + DHi     | 0.979 | 7.416 | 0.981 | 0.202  | 1349.20 |
| 9    | + Alt     | 0.985 | 7.406 | 0.985 | 0.1987 | 1345.87 |
| 10   | + DTn20   | 0.989 | 7.397 | 0.990 | 0.1991 | 1342.85 |
| 11   | + TJan    | 0.994 | 7.386 | 0.994 | 0.1941 | 1339.61 |
| 12   | + AET     | 0.998 | 7.380 | 0.998 | 0.1942 | 1337.73 |
| 13   | + TRan    | 1     | 7.377 | 1     | 0.197  | 1337.45 |

**Favourability model of step 6:**

| Variables | $\beta$  | SE      | Sig | Evaluation metrics |         |
|-----------|----------|---------|-----|--------------------|---------|
| Intercept | 11.46    | 1.05    | *** | AUC                | 0.894   |
| PWin      | -0.0237  | 0.00220 | *** | Kappa              | 0.178   |
| PET       | -0.00993 | 0.00119 | *** | Sensitivity        | 0.831   |
| U100      | 0.0176   | 0.00283 | *** | Specificity        | 0.763   |
| U500      | -0.00956 | 0.00194 | *** | CCR                | 0.766   |
| Slop      | -0.199   | 0.0527  | *** | HL                 | 14.22 * |
| HPd       | -0.0147  | 0.00635 | *   |                    |         |

**Final favourability model (step 13):**

| Variables | $\beta$  | SE       | Sig | Evaluation metrics |          |
|-----------|----------|----------|-----|--------------------|----------|
| Intercept | 13.48    | 2.14     | *** | AUC                | 0.900    |
| PWin      | -0.0194  | 0.00285  | *** | Kappa              | 0.192    |
| PET       | -0.00507 | 0.00299  | ns  | Sensitivity        | 0.840    |
| U100      | 0.0128   | 0.00343  | *** | Specificity        | 0.777    |
| U500      | -0.0124  | 0.00207  | *** | CCR                | 0.779    |
| Slop      | -0.315   | 0.0643   | *** | HL                 | 19.49 ** |
| HPd       | -0.0118  | 0.00588  | *   |                    |          |
| WE        | -0.0184  | 0.00651  | **  |                    |          |
| DHi       | 0.00792  | 0.00388  | *   |                    |          |
| Alt       | 0.000817 | 0.000515 | ns  |                    |          |
| DTn20     | 0.0319   | 0.0116   | **  |                    |          |
| TJan      | -0.293   | 0.111    | **  |                    |          |
| AET       | -0.00245 | 0.00121  | *   |                    |          |
| TRan      | -0.134   | 0.0885   | ns  |                    |          |

## *Chersophilus duponti* (cont.)

Calibration plots:

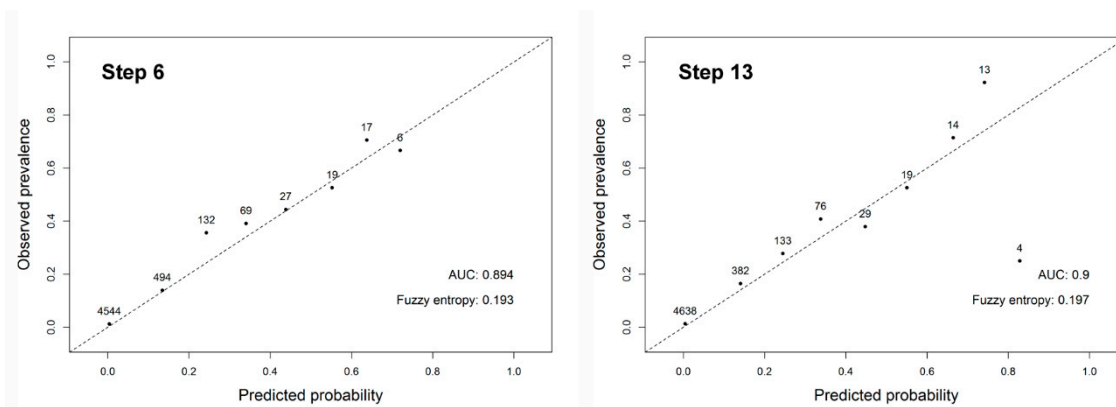

Distribution and favourability:

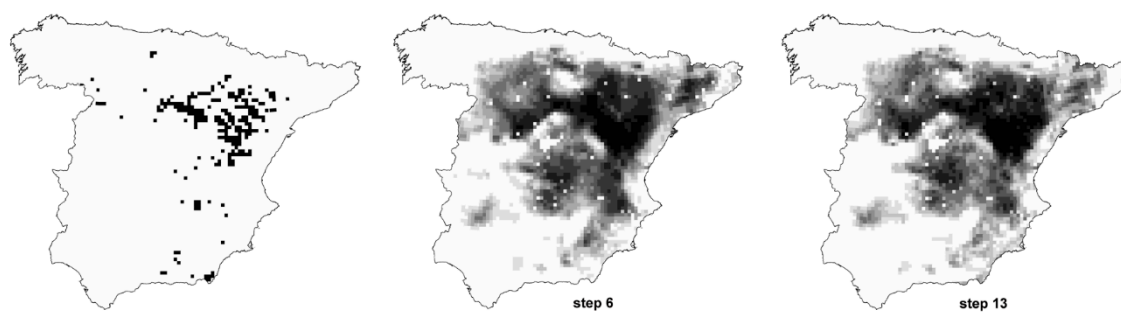



## *Sylvia conspicillata*

Entropy of each step:

| Step | Variable  | Cor_P | H     | Cor_F | R      | AIC     |
|------|-----------|-------|-------|-------|--------|---------|
| 0    | Intercept | -     | 8.58  | -     | 1      | 5909.44 |
| 1    | + DP10Aut | 0.824 | 8.35  | 0.878 | 0.467  | 5160.62 |
| 2    | + CTI     | 0.891 | 8.32  | 0.916 | 0.451  | 5063.95 |
| 3    | + Sil     | 0.913 | 8.31  | 0.943 | 0.429  | 5021.69 |
| 4    | + PSum    | 0.932 | 8.30  | 0.955 | 0.425  | 4994.18 |
| 5    | + Alt     | 0.957 | 8.29  | 0.968 | 0.406  | 4955.96 |
| 6    | + DHi     | 0.972 | 8.28  | 0.980 | 0.400  | 4929.42 |
| 7    | + U500    | 0.983 | 8.276 | 0.989 | 0.3960 | 4911.05 |
| 8    | + TRan    | 0.993 | 8.272 | 0.995 | 0.394  | 4894.74 |
| 9    | + PET     | 0.997 | 8.271 | 0.998 | 0.395  | 4888.98 |
| 10   | + Grav    | 1     | 8.270 | 1     | 0.3957 | 4885.93 |

Favourability model of step 8:

| Variables | $\beta$  | SE       | Sig | Evaluation metrics |         |
|-----------|----------|----------|-----|--------------------|---------|
| Intercept | 10.36    | 0.873    | *** | AUC                | 0.779   |
| DP10Aut   | -0.494   | 0.0293   | *** | Kappa              | 0.334   |
| CTI       | -0.311   | 0.0461   | *** | Sensitivity        | 0.791   |
| Sil       | -0.652   | 0.123    | *** | Specificity        | 0.643   |
| PSum      | -0.00877 | 0.00114  | *** | CCR                | 0.679   |
| Alt       | 0.00122  | 0.000133 | *** | HL                 | 6.90 ns |
| DHi       | -0.00708 | 0.00184  | *** |                    |         |
| U500      | -0.00343 | 0.000687 | *** |                    |         |
| TRan      | -0.0931  | 0.0218   | *** |                    |         |

Final favourability model (step 10):

| Variables | $\beta$  | SE       | Sig | Evaluation metrics |          |
|-----------|----------|----------|-----|--------------------|----------|
| Intercept | 8.20     | 1.40     | *** | AUC                | 0.781    |
| DP10Aut   | -0.491   | 0.0295   | *** | Kappa              | 0.340    |
| CTI       | -0.306   | 0.0559   | *** | Sensitivity        | 0.796    |
| Sil       | -0.603   | 0.126    | *** | Specificity        | 0.646    |
| PSum      | -0.00658 | 0.00142  | *** | CCR                | 0.683    |
| Alt       | 0.00155  | 0.000183 | *** | HL                 | 24.01 ** |
| DHi       | -0.00633 | 0.00187  | *** |                    |          |
| U500      | -0.00354 | 0.000691 | *** |                    |          |
| TRan      | -0.0908  | 0.0229   | *** |                    |          |
| PET       | 0.00194  | 0.000746 | **  |                    |          |
| Grav      | 0.453    | 0.201    | *   |                    |          |

## *Sylvia conspicillata* (cont.)

Calibration plots:

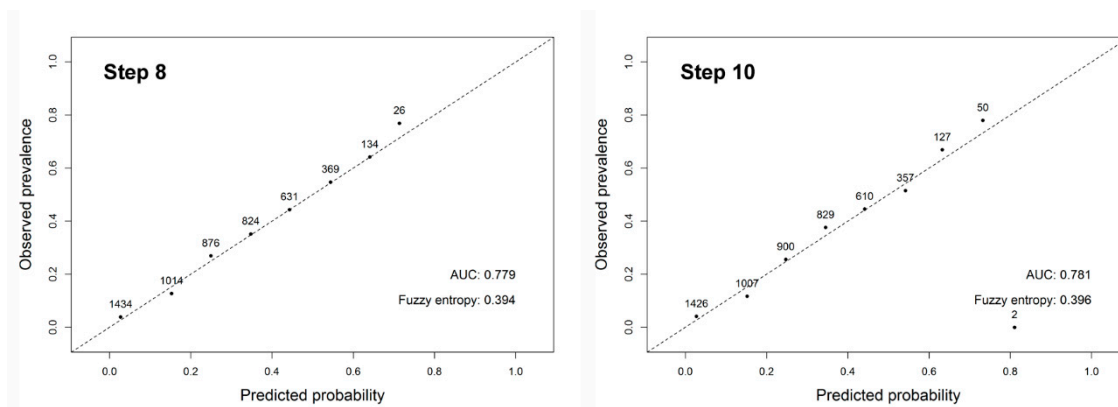

Distribution and favourability:

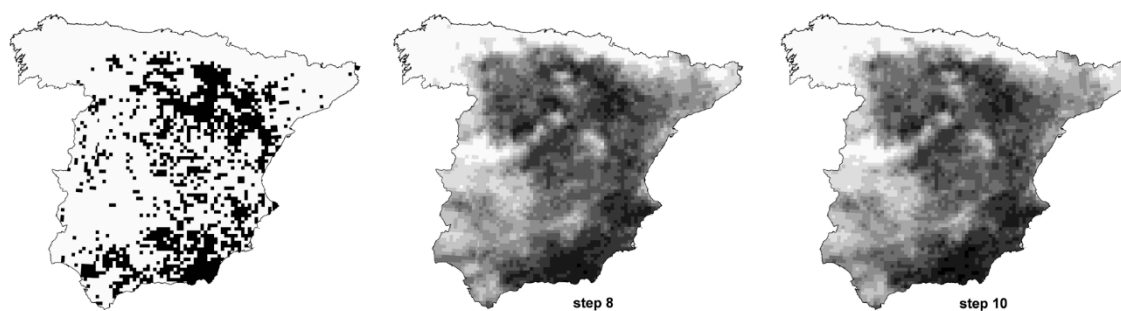

## *Galemys pyrenaicus*

Entropy of each step:

| Step | Variable  | Cor_P  | H     | Cor_F | R      | AIC     |
|------|-----------|--------|-------|-------|--------|---------|
| 0    | Intercept | -      | 8.58  | -     | 1      | 3374.19 |
| 1    | + SIDSpr  | 0.816  | 7.60  | 0.917 | 0.204  | 2192.14 |
| 2    | + PET     | 0.918  | 7.46  | 0.933 | 0.162  | 2021.68 |
| 3    | + DAlt    | 0.939  | 7.44  | 0.951 | 0.168  | 1971.04 |
| 4    | + U100    | 0.962  | 7.40  | 0.967 | 0.155  | 1919.65 |
| 5    | + Calc    | 0.982  | 7.363 | 0.981 | 0.1472 | 1876.46 |
| 6    | + TRan    | 0.985  | 7.357 | 0.985 | 0.1468 | 1869.05 |
| 7    | + U500    | 0.990  | 7.354 | 0.987 | 0.1488 | 1862.62 |
| 8    | + DTn20   | 0.991  | 7.352 | 0.991 | 0.1494 | 1856.99 |
| 9    | + AET     | 0.993  | 7.34  | 0.994 | 0.140  | 1852.17 |
| 10   | + Clay    | 0.995  | 7.333 | 0.996 | 0.139  | 1847.81 |
| 11   | + DP30Sum | 0.997  | 7.329 | 0.997 | 0.138  | 1844.66 |
| 12   | + Alt     | 0.9997 | 7.324 | 0.998 | 0.137  | 1841.88 |
| 13   | + Gyps    | 1      | 7.321 | 1     | 0.136  | 1841.69 |

Final favourability model (step 13):

| Variables | ß         | SE       | Sig | Evaluation metrics |          |
|-----------|-----------|----------|-----|--------------------|----------|
| Intercept | 15.12     | 1.52     | *** | AUC                | 0.941    |
| SIDSpr    | -2.32     | 0.329    | *** | Kappa              | 0.462    |
| PET       | -0.0195   | 0.00214  | *** | Sensitivity        | 0.901    |
| DAlt      | 0.00169   | 0.000228 | *** | Specificity        | 0.843    |
| U100      | -0.0195   | 0.00273  | *** | CCR                | 0.849    |
| Calc      | -0.968    | 0.239    | *** | HL                 | 10.01 ns |
| TRan      | 0.260     | 0.0571   | *** |                    |          |
| U500      | 0.00364   | 0.00124  | **  |                    |          |
| DTn20     | 0.0399    | 0.0138   | **  |                    |          |
| AET       | 0.00284   | 0.00103  | **  |                    |          |
| Clay      | 0.660     | 0.255    | **  |                    |          |
| DP30Sum   | -0.302    | 0.143    | *   |                    |          |
| Alt       | -0.000618 | 0.000274 | *   |                    |          |
| Gyps      | -2.10     | 1.75     | ns  |                    |          |

## *Galemys pyrenaicus* (cont.)

Calibration plot:

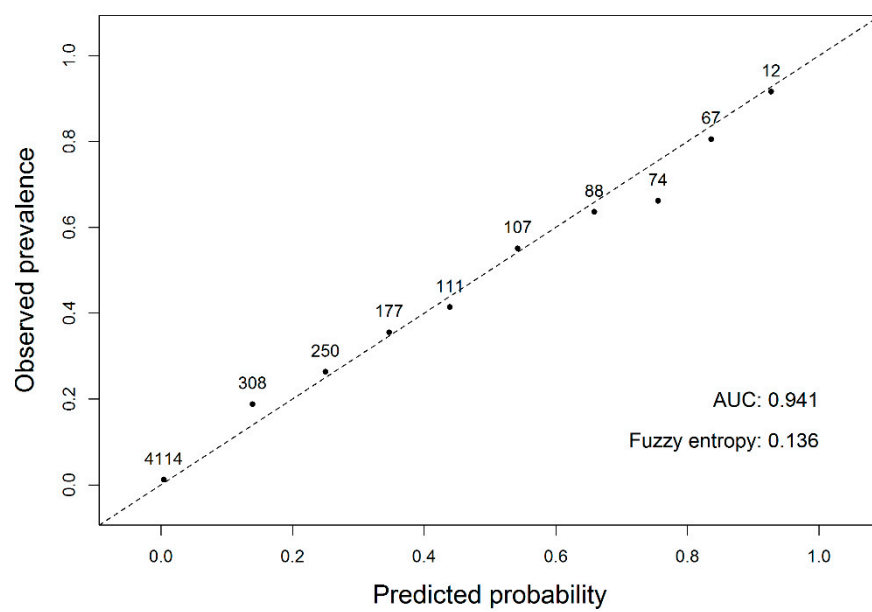

Distribution and favourability:

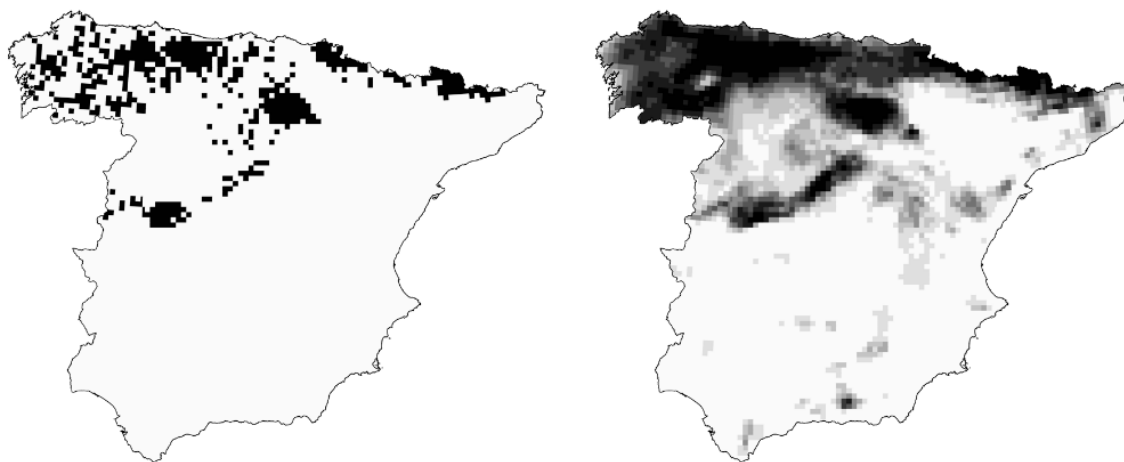

## *Lynx pardinus*

### Entropy of each step:

| Step | Variable   | Cor_P | H    | Cor_F | R      | AIC    |
|------|------------|-------|------|-------|--------|--------|
| 0    | Intercept  | -     | 8.58 | -     | 1      | 362.00 |
| 1    | + DTx25Aut | 0.625 | 6.22 | 0.772 | 0.0788 | 224.28 |
| 2    | + SISSum   | 0.781 | 5.90 | 0.889 | 0.0603 | 207.11 |
| 3    | + SE       | 0.915 | 5.71 | 0.913 | 0.0548 | 196.38 |
| 4    | + DP30Sum  | 0.931 | 5.58 | 0.942 | 0.0471 | 189.76 |
| 5    | + DTn20    | 0.963 | 5.53 | 0.957 | 0.0512 | 188.08 |
| 6    | + U500     | 0.977 | 5.50 | 0.970 | 0.0456 | 187.38 |
| 7    | + ROff     | 0.987 | 5.45 | 0.989 | 0.0441 | 185.92 |
| 8    | + DP30Spr  | 1     | 5.41 | 1     | 0.0446 | 185.53 |

### Favourability model of step 7:

| Variables | $\beta$ | SE      | Sig | Evaluation metrics |         |
|-----------|---------|---------|-----|--------------------|---------|
| Intercept | -280.80 | 60.19   | *** | AUC                | 0.981   |
| DTx25Aut  | 0.315   | 0.0759  | *** | Kappa              | 0.109   |
| SISSum    | 33.99   | 7.72    | *** | Sensitivity        | 0.897   |
| SE        | 0.0665  | 0.0190  | *** | Specificity        | 0.927   |
| DP30Sum   | 11.70   | 3.15    | *** | CCR                | 0.927   |
| DTn20     | -0.0554 | 0.0243  | *   | HL                 | 4.90 ns |
| U500      | 0.0109  | 0.00553 | *   |                    |         |
| ROff      | 0.00540 | 0.00270 | *   |                    |         |

### Final favourability model (step 8):

| Variables | $\beta$ | SE      | Sig | Evaluation metrics |         |
|-----------|---------|---------|-----|--------------------|---------|
| Intercept | -285.80 | 62.51   | *** | AUC                | 0.982   |
| DTx25Aut  | 0.291   | 0.0752  | *** | Kappa              | 0.118   |
| SISSum    | 34.73   | 8.02    | *** | Sensitivity        | 0.931   |
| SE        | 0.0685  | 0.0188  | *** | Specificity        | 0.930   |
| DP30Sum   | 13.10   | 3.23    | *** | CCR                | 0.930   |
| DTn20     | -0.0445 | 0.0253  | ns  | HL                 | 3.33 ns |
| U500      | 0.00855 | 0.00568 | ns  |                    |         |
| ROff      | 0.00888 | 0.00362 | *   |                    |         |
| DP30Spr   | -1.22   | 0.822   | ns  |                    |         |

## *Lynx pardinus* (cont.)

### Calibration plots:

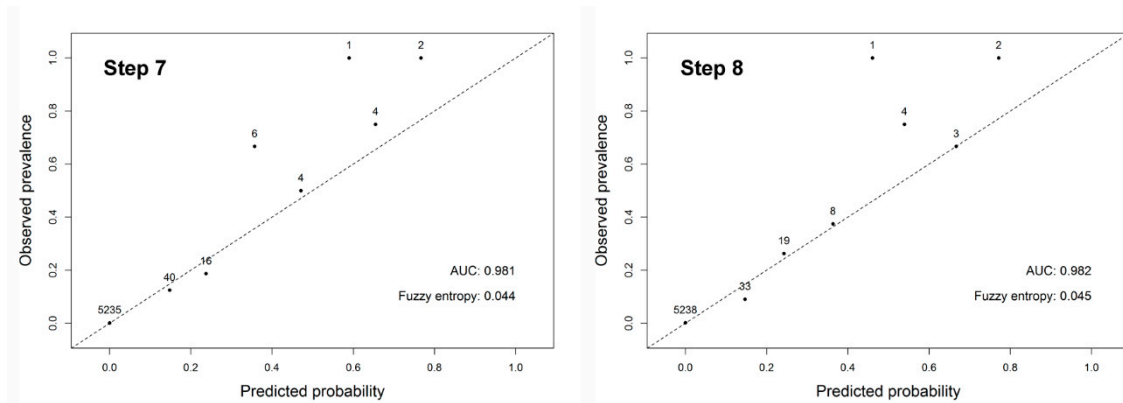

### Distribution and favourability:

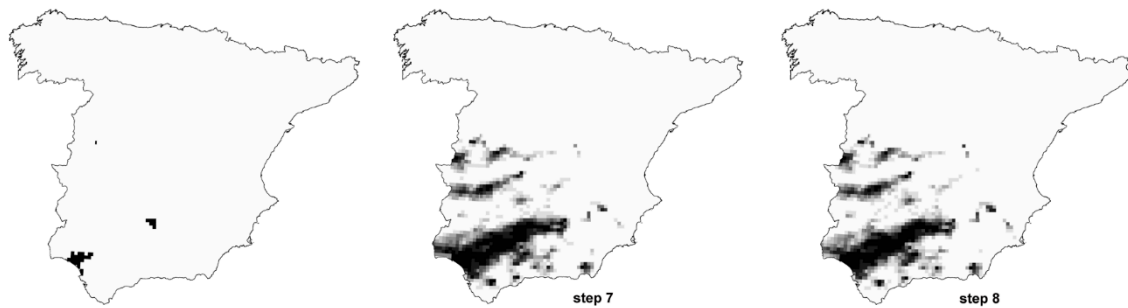

## *Capra pyrenaica*

Entropy of each step:

| Step | Variable  | Cor_P | H     | Cor_F | R       | AIC     |
|------|-----------|-------|-------|-------|---------|---------|
| 0    | Intercept | -     | 8.58  | -     | 1       | 3937.11 |
| 1    | + DAlt    | 0.464 | 8.35  | 0.466 | 0.572   | 3578.82 |
| 2    | + SISWin  | 0.728 | 8.09  | 0.756 | 0.396   | 3158.69 |
| 3    | + Alt     | 0.842 | 7.95  | 0.853 | 0.340   | 2926.03 |
| 4    | + Calc    | 0.906 | 7.86  | 0.898 | 0.296   | 2790.14 |
| 5    | + CTI     | 0.930 | 7.81  | 0.935 | 0.266   | 2717.59 |
| 6    | + Sil     | 0.941 | 7.79  | 0.943 | 0.259   | 2694.03 |
| 7    | + DP30Spr | 0.950 | 7.783 | 0.950 | 0.2555  | 2673.58 |
| 8    | + DTn0Sum | 0.958 | 7.776 | 0.955 | 0.2557  | 2659.22 |
| 9    | + WE      | 0.965 | 7.77  | 0.962 | 0.252   | 2643.73 |
| 10   | + U100    | 0.971 | 7.752 | 0.968 | 0.244   | 2629.38 |
| 11   | + Gyps    | 0.973 | 7.745 | 0.975 | 0.2402  | 2622.42 |
| 12   | + TnWin   | 0.977 | 7.743 | 0.975 | 0.2396  | 2617.60 |
| 13   | + TRan    | 0.982 | 7.736 | 0.983 | 0.239   | 2603.83 |
| 14   | + DP01Win | 0.989 | 7.72  | 0.989 | 0.23147 | 2588.95 |
| 15   | + DTn20   | 0.995 | 7.714 | 0.995 | 0.23146 | 2576.05 |
| 16   | + DHi     | 0.997 | 7.710 | 0.997 | 0.2295  | 2571.82 |
| 17   | + Grav    | 0.999 | 7.708 | 0.999 | 0.2289  | 2569.47 |
| 18   | + U500    | 1     | 7.70  | 1     | 0.227   | 2568.37 |

Final favourability model (step 18):

| Variables | $\beta$  | SE       | Sig | Evaluation metrics |          |
|-----------|----------|----------|-----|--------------------|----------|
| Intercept | 4.89     | 2.39     | ns  | AUC                | 0.896    |
| DAlt      | 0.000381 | 0.000256 | ns  | Kappa              | 0.416    |
| SISWin    | 2.70     | 0.369    | *** | Sensitivity        | 0.838    |
| Alt       | 0.00335  | 0.000340 | *** | Specificity        | 0.803    |
| Calc      | 0.397    | 0.231    | ns  | CCR                | 0.808    |
| CTI       | -0.981   | 0.131    | *** | HL                 | 13.10 ns |
| Sil       | -1.30    | 0.227    | *** |                    |          |
| DP30Spr   | 0.645    | 0.113    | *** |                    |          |
| DTn0Sum   | -0.532   | 0.257    | *   |                    |          |
| WE        | -0.0177  | 0.00484  | *** |                    |          |
| U100      | 0.00510  | 0.00245  | *   |                    |          |
| Gyps      | -3.75    | 1.60     | *   |                    |          |
| TnWin     | 0.419    | 0.0616   | *** |                    |          |
| TRan      | 0.254    | 0.0466   | *** |                    |          |
| DP01Win   | -0.0558  | 0.0124   | *** |                    |          |
| DTn20     | -0.0202  | 0.00591  | *** |                    |          |
| DHi       | 0.00793  | 0.00289  | **  |                    |          |
| Grav      | 0.868    | 0.379    | *   |                    |          |
| U500      | -0.00206 | 0.00117  | ns  |                    |          |

## *Capra pyrenaica* (cont.)

Calibration plot:

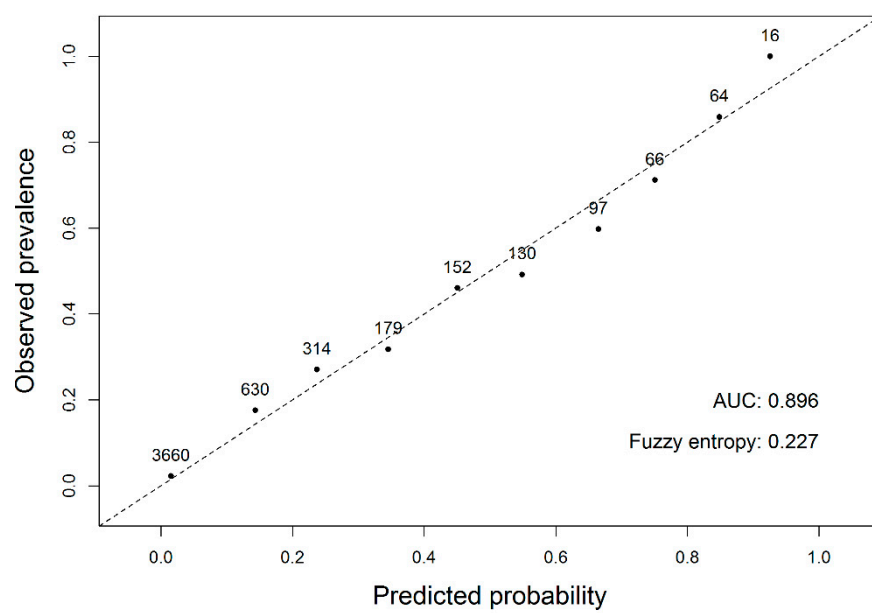

Distribution and favourability:

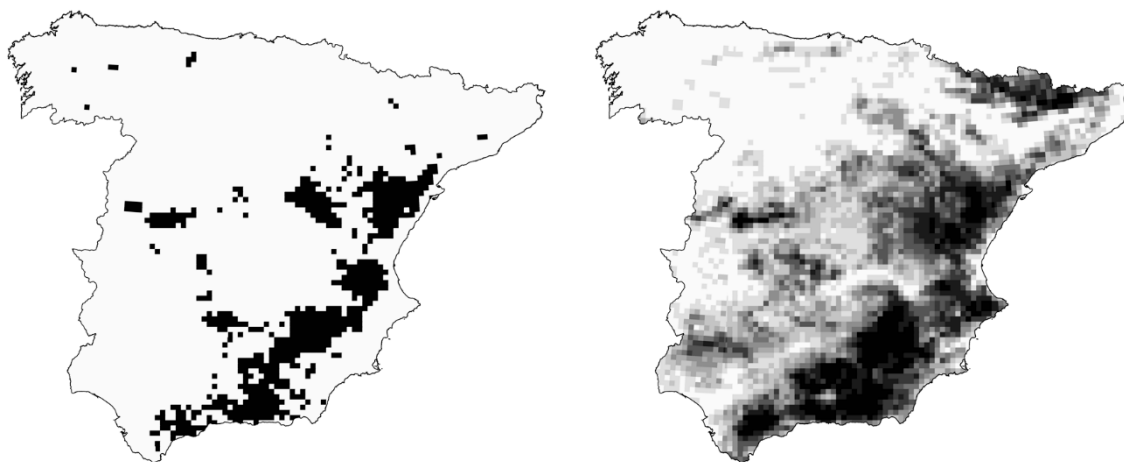



## *Microtus cabrerar*

### Entropy of each step:

| Step | Variable   | Cor_P | H     | Cor_F | R      | AIC     |
|------|------------|-------|-------|-------|--------|---------|
| 0    | Intercept  | -     | 8.58  | -     | 1      | 2148.13 |
| 1    | + TRan     | 0.330 | 8.34  | 0.586 | 0.518  | 2012.46 |
| 2    | + AET      | 0.589 | 8.10  | 0.712 | 0.415  | 1870.47 |
| 3    | + PET      | 0.706 | 7.92  | 0.836 | 0.335  | 1770.52 |
| 4    | + SIDSum   | 0.849 | 7.77  | 0.930 | 0.278  | 1679.36 |
| 5    | + Calc     | 0.890 | 7.72  | 0.954 | 0.265  | 1649.60 |
| 6    | + DTn20Aut | 0.924 | 7.68  | 0.969 | 0.251  | 1629.98 |
| 7    | + CTI      | 0.957 | 7.65  | 0.980 | 0.2455 | 1613.24 |
| 8    | + TnWin    | 0.980 | 7.63  | 0.990 | 0.2463 | 1599.77 |
| 9    | + U500     | 0.994 | 7.62  | 0.996 | 0.2468 | 1592.70 |
| 10   | + Alt      | 0.997 | 7.613 | 0.998 | 0.2471 | 1592.21 |
| 11   | + DP30Sum  | 1     | 7.610 | 1     | 0.2464 | 1592.13 |

### Favourability model of step 7:

| Variables | $\beta$ | SE       | Sig | Evaluation metrics |         |
|-----------|---------|----------|-----|--------------------|---------|
| Intercept | -11.12  | 1.97     | *** | AUC                | 0.864   |
| TRan      | 0.446   | 0.0673   | *** | Kappa              | 0.172   |
| AET       | 0.00661 | 0.000709 | *** | Sensitivity        | 0.787   |
| PET       | -0.0145 | 0.00142  | *** | Specificity        | 0.748   |
| SIDSum    | 3.30    | 0.319    | *** | CCR                | 0.750   |
| Calc      | 1.12    | 0.126    | *** | HL                 | 5.53 ns |
| DTn20Aut  | -0.302  | 0.0671   | *** |                    |         |
| CTI       | -0.400  | 0.0940   | *** |                    |         |

### Final favourability model (step 11):

| Variables | $\beta$  | SE       | Sig | Evaluation metrics |         |
|-----------|----------|----------|-----|--------------------|---------|
| Intercept | -11.08   | 3.11     | *** | AUC                | 0.871   |
| TRan      | 0.618    | 0.0810   | *** | Kappa              | 0.183   |
| AET       | 0.00641  | 0.000722 | *** | Sensitivity        | 0.805   |
| PET       | -0.0181  | 0.00193  | *** | Specificity        | 0.755   |
| SIDSum    | 2.92     | 0.420    | *** | CCR                | 0.757   |
| Calc      | 1.07     | 0.231    | *** | HL                 | 7.43 ns |
| DTn20Aut  | -0.408   | 0.0724   | *** |                    |         |
| CTI       | -0.366   | 0.15     | **  |                    |         |
| TnWin     | 0.370    | 0.0822   | *** |                    |         |
| U500      | 0.00387  | 0.00133  | **  |                    |         |
| Alt       | 0.000830 | 0.000447 | ns  |                    |         |
| DP30Sum   | 0.443    | 0.307    | ns  |                    |         |

## *Microtus cabrerae* (cont.)

### Calibration plots:

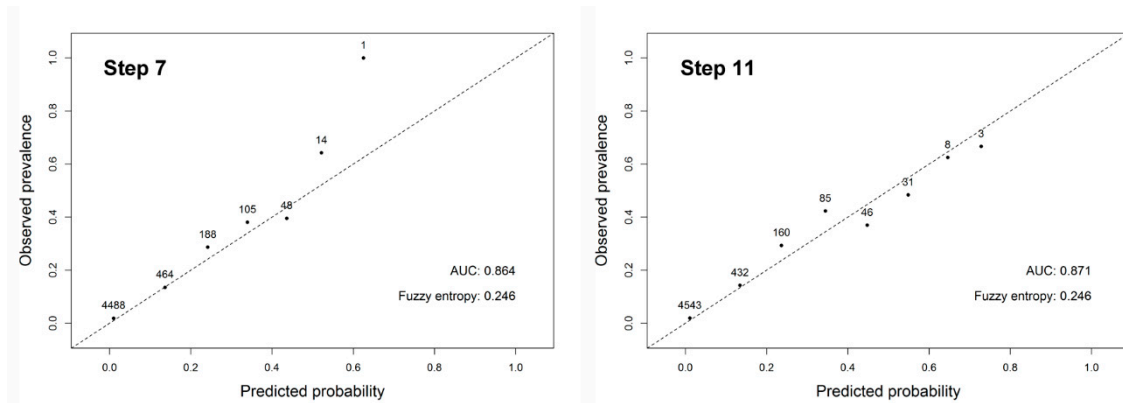

### Distribution and favourability:

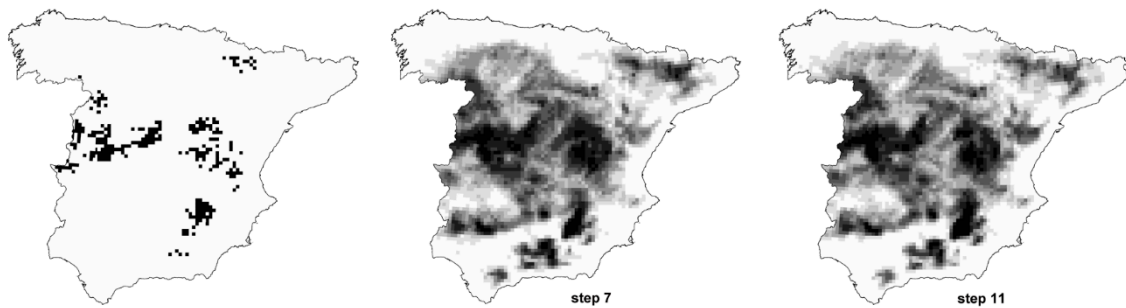

## *Lepus castroviejoi*

Entropy of each step:

| Step | Variable  | Cor_P | H    | Cor_F | R      | AIC    |
|------|-----------|-------|------|-------|--------|--------|
| 0    | Intercept | -     | 8.58 | -     | 1      | 738.41 |
| 1    | + AET     | 0.529 | 6.17 | 0.689 | 0.0683 | 391.09 |
| 2    | + TRan    | 0.761 | 5.60 | 0.858 | 0.0354 | 298.52 |
| 3    | + DP30Sum | 0.829 | 5.47 | 0.878 | 0.0297 | 277.41 |
| 4    | + CTI     | 0.908 | 5.25 | 0.954 | 0.0213 | 239.33 |
| 5    | + DP30Spr | 0.948 | 5.17 | 0.960 | 0.0186 | 227.29 |
| 6    | + U500    | 0.961 | 5.14 | 0.974 | 0.0178 | 222.68 |
| 7    | + Alt     | 0.975 | 5.11 | 0.983 | 0.0184 | 217.55 |
| 8    | + Clay    | 0.987 | 5.08 | 0.991 | 0.0180 | 213.35 |
| 9    | + ROff    | 0.995 | 5.06 | 0.994 | 0.0182 | 211.26 |
| 10   | + SE      | 1     | 5.05 | 1     | 0.0187 | 209.94 |

Favourability model of step 6:

| Variables | $\beta$ | SE      | Sig | Evaluation metrics |         |
|-----------|---------|---------|-----|--------------------|---------|
| Intercept | 94.78   | 11.63   | *** | AUC                | 0.994   |
| AET       | -0.0712 | 0.0108  | *** | Kappa              | 0.385   |
| TRan      | -0.656  | 0.149   | *** | Sensitivity        | 0.986   |
| DP30Sum   | -3.55   | 0.597   | *** | Specificity        | 0.961   |
| CTI       | -2.48   | 0.526   | *** | CCR                | 0.961   |
| DP30Spr   | 1.057   | 0.270   | *** | HL                 | 8.12 ns |
| U500      | 0.00900 | 0.00362 | *   |                    |         |

Final favourability model (step 10):

| Variables | $\beta$ | SE       | Sig | Evaluation metrics |         |
|-----------|---------|----------|-----|--------------------|---------|
| Intercept | 69.81   | 12.50    | *** | AUC                | 0.995   |
| AET       | -0.0558 | 0.0112   | *** | Kappa              | 0.402   |
| TRan      | -0.837  | 0.214    | *** | Sensitivity        | 0.986   |
| DP30Sum   | -3.779  | 0.744    | *** | Specificity        | 0.964   |
| CTI       | -1.557  | 0.608    | *   | CCR                | 0.964   |
| DP30Spr   | 1.08    | 0.324    | *** | HL                 | 4.76 ns |
| U500      | 0.0182  | 0.00496  | *** |                    |         |
| Alt       | 0.00314 | 0.00101  | **  |                    |         |
| Clay      | 2.62    | 1.04     | *   |                    |         |
| ROff      | 0.00136 | 0.000715 | ns  |                    |         |
| SE        | -0.0398 | 0.0218   | ns  |                    |         |

## *Lepus castroviejoi* (cont.)

Calibration plots:

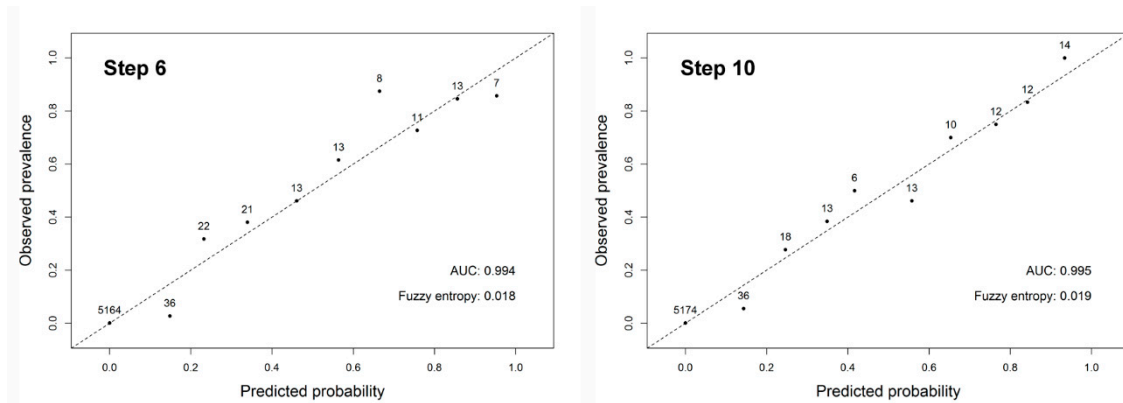

Distribution and favourability:

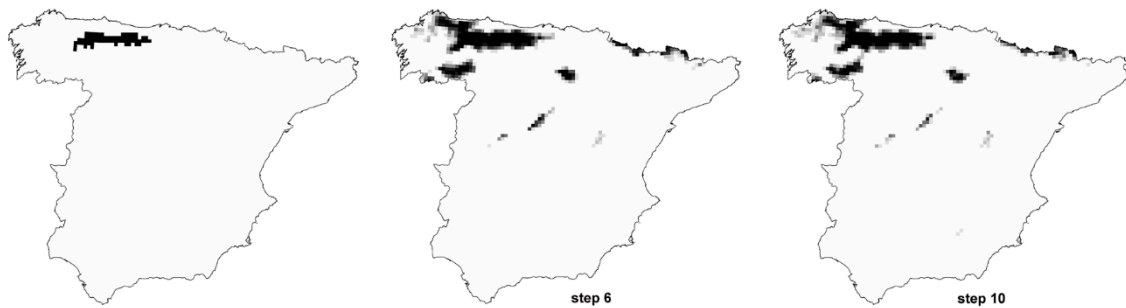

Supplement: s1 [file s1]
