# Supplementary material for: A Stepwise Assessment of Parsimony and Fuzzy Entropy in Species Distribution Modelling
Source: MDPI journal article supplement (doi:10.3390/e23081014), 2021-08-05
Supplement: s1 [file s1]

# **A stepwise assessment of parsimony and fuzzy entropy in species distribution modelling**

Alba Estrada & Raimundo Real

## **Supplementary Materials S2.**

Calibration plots, AUC values and fuzzy entropy of each step of the models of *Chalcides bedriagai* and *Sylvia conspicillata* (those studied species with lower values of AUC). Numbers in the calibration plots indicate the sample size of each bin.

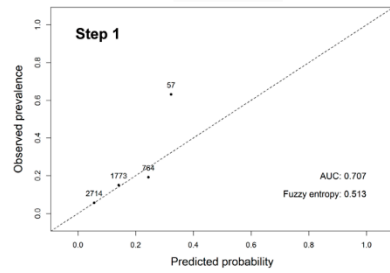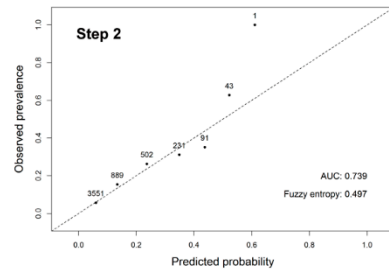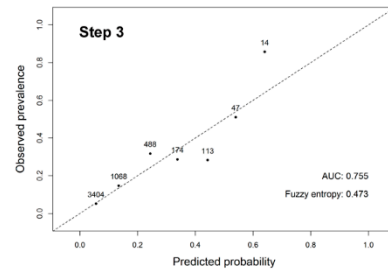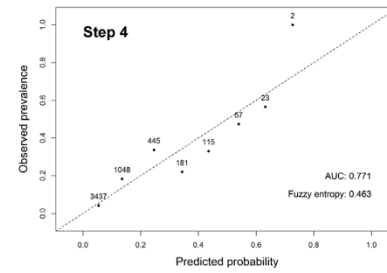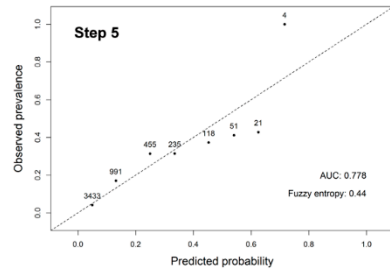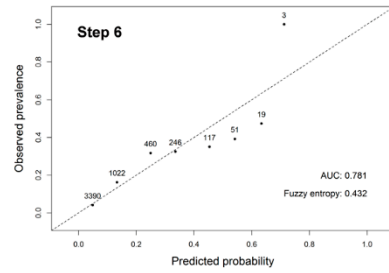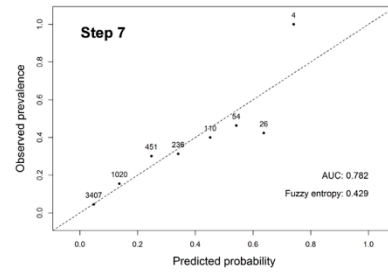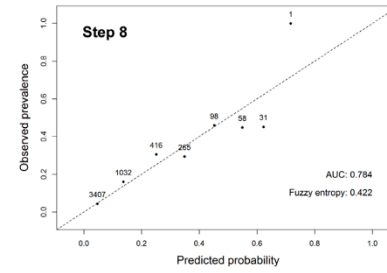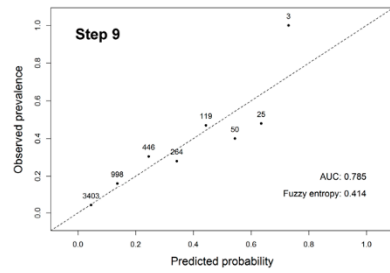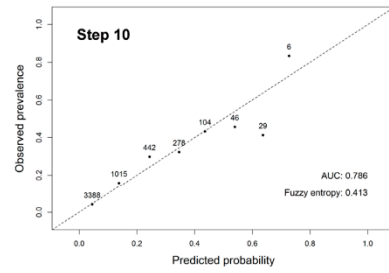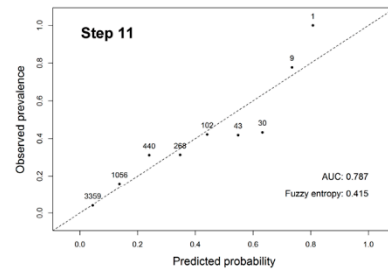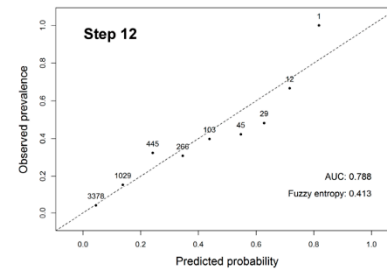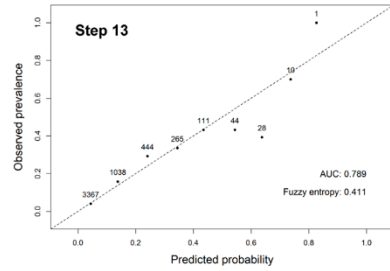

**Steps *Chalcides bedriagai***

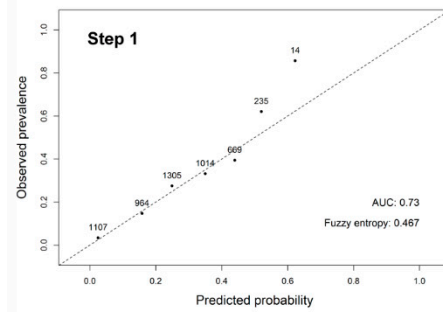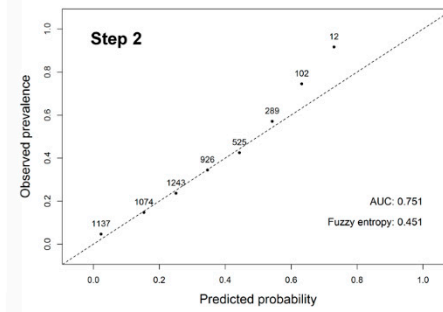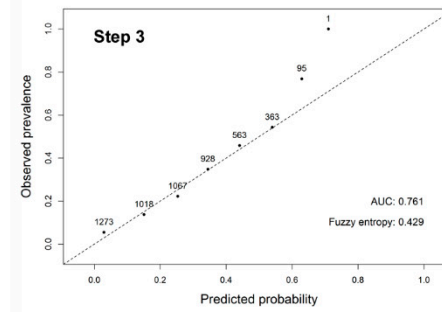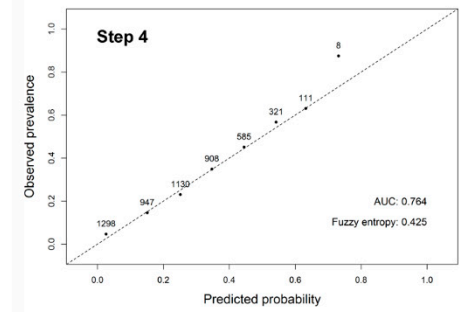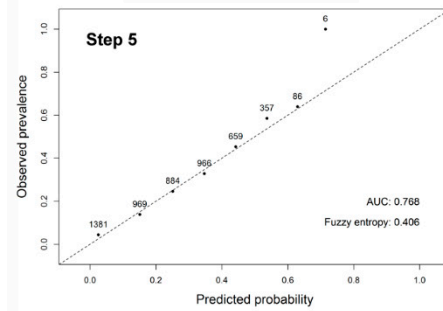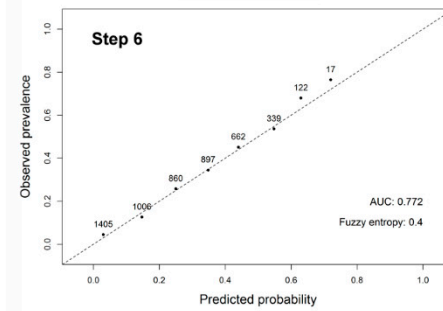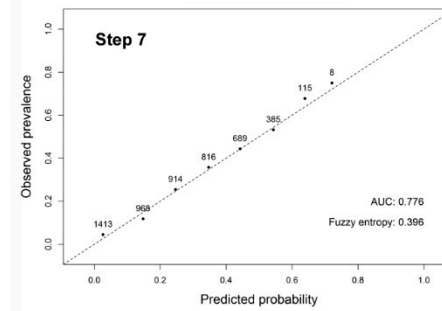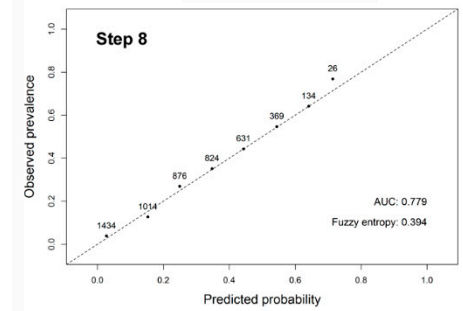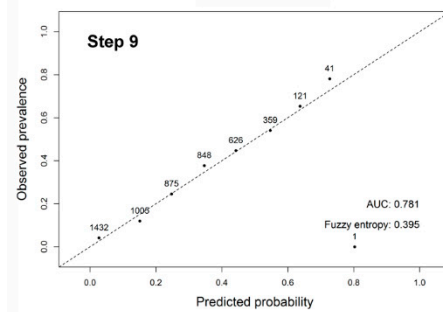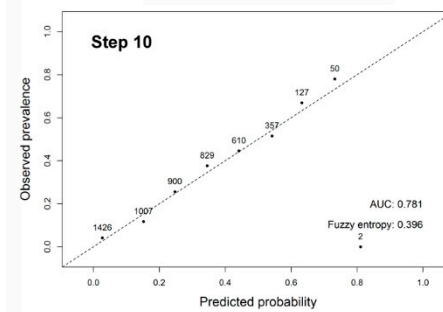

**Steps *Sylvia conspicillata***
