# Supplementary material for: A Stepwise Assessment of Parsimony and Fuzzy Entropy in Species Distribution Modelling
Source: MDPI journal article supplement (doi:10.3390/e23081014), 2021-08-05
Supplement: s1 [file s1]

# A stepwise assessment of parsimony and fuzzy entropy in species distribution modelling

Alba Estrada & Raimundo Real

**Table S1.** Environmental variables considered. In all cases, variables are the average value in the UTM cell. For each species, we performed a selection of variables in three stages (see Methods).

| Variable                                             | Code              | Variable                                                      | Code              |
|------------------------------------------------------|-------------------|---------------------------------------------------------------|-------------------|
| Climate                                              |                   | Climate                                                       |                   |
| Mean annual temperature (°C)                         | Tann <sup>1</sup> | Total precipitation in summer                                 | PSum              |
| Mean temperature in spring                           | TSpr              | Total precipitation in autumn                                 | PAut              |
| Mean temperature in summer                           | TSum              | Total precipitation in winter                                 | PWin              |
| Mean temperature in autumn                           | TAut              | Days with precipitation ≥0.1mm                                | DP01              |
| Mean temperature in winter                           | TWin              | Days with precipitation ≥0.1mm in spring                      | DP01Spr           |
| Mean temperature in January                          | TJan              | Days with precipitation ≥0.1mm in summer                      | DP01Sum           |
| Mean temperature in July                             | TJul              | Days with precipitation ≥0.1mm in autumn                      | DP01Aut           |
| Annual temperature range (=TJul - TJan)              | TRan              | Days with precipitation ≥0.1mm in winter                      | DP01Win           |
| Minimum annual temperature                           | TnAnn             | Days with precipitation ≥1mm                                  | DP1               |
| Minimum temperature in spring                        | TnSpr             | Days with precipitation ≥1mm in spring                        | DP1Spr            |
| Minimum temperature in summer                        | TnSum             | Days with precipitation ≥1mm in summer                        | DP1Sum            |
| Minimum temperature in autumn                        | TnAut             | Days with precipitation ≥1mm in autumn                        | DP1Aut            |
| Minimum temperature in winter                        | TnWin             | Days with precipitation ≥1mm in winter                        | DP1Win            |
| Minimum temperature in January                       | TnJan             | Days with precipitation ≥10mm                                 | DP10              |
| Minimum temperature in July                          | TnJul             | Days with precipitation ≥10mm in spring                       | DP10Spr           |
| Maximum annual temperature                           | TxAnn             | Days with precipitation ≥10mm in summer                       | DP10Sum           |
| Maximum temperature in spring                        | TxSpr             | Days with precipitation ≥10mm in autumn                       | DP10Aut           |
| Maximum temperature in summer                        | TxSum             | Days with precipitation ≥10mm in winter                       | DP10Win           |
| Maximum temperature in autumn                        | TxAut             | Days with precipitation ≥30mm                                 | DP30              |
| Maximum temperature in winter                        | TxWin             | Days with precipitation ≥30mm in spring                       | DP30Spr           |
| Maximum temperature in January                       | TxJan             | Days with precipitation ≥30mm in summer                       | DP30Sum           |
| Maximum temperature in July                          | TxJul             | Days with precipitation ≥30mm in autumn                       | DP30Aut           |
| Direct Irradiance at Surface (kWh/m <sup>2</sup> /d) | SID <sup>2</sup>  | Days with precipitation ≥30mm in winter                       | DP30Win           |
| Direct Irradiance at Surface in spring               | SIDSpr            | Mean annual runoff (mm)                                       | ROff <sup>3</sup> |
| Direct Irradiance at Surface in summer               | SIDSum            | Mean annual potential evapotranspiration (mm)                 | PET <sup>4</sup>  |
| Direct Irradiance at Surface in autumn               | SIDAut            | Mean annual actual evapotranspiration (mm) (=min [PAnn, PET]) | AET               |
| Direct Irradiance at Surface in winter               | SIDWin            | <b>Topography</b>                                             |                   |
| Surface Incoming Radiation (kWh/m <sup>2</sup> /d)   | SIS               | Mean altitude (m)                                             | Alt <sup>5</sup>  |
| Surface Incoming Radiation in spring                 | SISSpr            | Altitude difference (calculated from Alt)                     | DAlt              |
| Surface Incoming Radiation in summer                 | SISSum            | Slope (°) (calculated from Alt)                               | Slop              |
| Surface Incoming Radiation in autumn                 | SISAut            | Southward exposition degree                                   | SE <sup>6</sup>   |

|                                                                   |          |                                                                              |                   |
|-------------------------------------------------------------------|----------|------------------------------------------------------------------------------|-------------------|
| Surface Incoming Radiation in winter                              | SISWin   | Westward exposition degree                                                   | WE <sup>6</sup>   |
| Days with minimum temperature $\leq 0^{\circ}\text{C}$            | DTn0     | Hydrologically conditioned compound topographic index                        | CTI <sup>7</sup>  |
| Days with minimum temperature $\leq 0^{\circ}\text{C}$ in spring  | DTn0Spr  | <b>Lithology</b>                                                             |                   |
| Days with minimum temperature $\leq 0^{\circ}\text{C}$ in summer  | DTn0Sum  | Proportion of clay                                                           | Clay <sup>8</sup> |
| Days with minimum temperature $\leq 0^{\circ}\text{C}$ in autumn  | DTn0Aut  | Proportion of silica                                                         | Sil               |
| Days with minimum temperature $\leq 0^{\circ}\text{C}$ in winter  | DTn0Win  | Proportion of calcareous rock                                                | Calc              |
| Days with minimum temperature $\geq 20^{\circ}\text{C}$           | DTn20    | Proportion of gravels                                                        | Grav              |
| Days with minimum temperature $\geq 20^{\circ}\text{C}$ in autumn | DTn20Aut | Proportion of gypsum                                                         | Gyps              |
| Days with maximum temperature $\geq 25^{\circ}\text{C}$           | DTx25    | <b>Human activity</b>                                                        |                   |
| Days with maximum temperature $\geq 25^{\circ}\text{C}$ in spring | DTx25Spr | Distance to the nearest highway (km)                                         | DHi <sup>9</sup>  |
| Days with maximum temperature $\geq 25^{\circ}\text{C}$ in summer | DTx25Sum | Distance to the nearest urban centre with more than 100,000 inhabitants (km) | U100              |
| Days with maximum temperature $\geq 25^{\circ}\text{C}$ in autumn | DTx25Aut | Distance to the nearest urban centre with more than 500,000 inhabitants (km) | U500              |
| Total annual precipitation (mm)                                   | PAnn     | Human population density (number of inhabitants/km <sup>2</sup> )            | HPd <sup>10</sup> |
| Total precipitation in spring                                     | PSpr     |                                                                              |                   |

Sources: 1: from *Tann* to *TxJul* and from *DTn0* to *DP30Win*: Agencia Estatal de Meteorología (2011); 2: from *SID* to *SISWin*: Sancho *et al.* (2012); 3: IGME (1979); 4: Font (2000); 5: US Geological Survey (1996); 6: Farr and Kobrick (2000); 7: <http://hydrosheds.cr.usgs.gov>; 8: from *Clay* to *Gyps*: OneGeology-Europe (2015); 9: from *DHi* to *U500*: IGN (1999); 10: ORNL (2001).

## References

- Agencia Estatal de Meteorología (2011) *Iberian climate atlas. Air temperature and precipitation (1971-2000)*. Agencia Estatal de Meteorología. Ministerio de Medio Ambiente y Medio Rural y Marino.
- Farr, T.G. & Kobrick, M. (2000) Shuttle radar topography mission produces a wealth of data. *Eos Trans. Am. Geophys. Union*, **81**, 583–585.
- Font, I. (2000) *Climatología de España y Portugal*. Ediciones Universidad de Salamanca.
- IGME (1979) *Mapa hidrogeológico nacional. Explicación de los mapas de lluvia útil, de reconocimiento hidrogeológico y de síntesis de los sistemas acuíferos. Vol. 81, 2ª ed.* Instituto Geológico y Minero de España. Ministerio de Industria y Energía, Madrid.
- IGN (1999) *Mapa de carreteras. Península Ibérica, Baleares y Canarias*. Instituto Geográfico Nacional, Ministerio de Fomento, Madrid.
- OneGeology-Europe (2015) <http://www.onegeology-europe.org/>.
- ORNL (2001) *LandScan 2000 Global Population Database*. Oak Ridge National Laboratory (ORNL), Oak Ridge, TN.

- Sancho, J.M., Riesco, J., Jiménez, C., Sánchez de Cos, M.C., Montero, J. & López, M. (2012) *Atlas de radiación solar en España utilizando datos del SAF de clima de EUMETSAT*. Agencia Estatal de Meteorología. Ministerio de Agricultura, Alimentación y Medio Ambiente.
- US Geological Survey (1996) GTOPO30. Land Processes Distributed Active Archive Center. <<http://www.edcdaac.usgs.gov/gtopo30/gtopo30.asp>>.
